1 **Direct visualization of native CRISPR target search in live bacteria reveals Cascade**

2 **DNA surveillance mechanism**

3

4 Jochem N.A. Vink<sup>1</sup>, Koen J.A. Martens<sup>2,3</sup>, Marnix Vlot<sup>4,5</sup>, Rebecca E. McKenzie<sup>1</sup>, Cristóbal  
5 Almendros<sup>1</sup>, Boris Estrada Bonilla<sup>1</sup>, Daan J.W. Brocken<sup>6</sup>, Johannes Hohlbein<sup>2,7§</sup>, Stan J.J.  
6 Brouns<sup>1,4§</sup>

7

8 <sup>1</sup> Kavli Institute of Nanoscience, Department of Bionanoscience, Delft University of  
9 Technology, Van der Maasweg 9, 2629 HZ Delft, Netherlands

10 <sup>2</sup> Laboratory of Biophysics, Wageningen University & Research, Stippeneng 4, 6708 WE  
11 Wageningen, Netherlands.

12 <sup>3</sup> Laboratory of Bionanotechnology, Wageningen University & Research, Bornse Weiland  
13 9, 6708 WG Wageningen, Netherlands

14 <sup>4</sup> Laboratory of Microbiology, Wageningen University & Research, Stippeneng 4, 6708 WE  
15 Wageningen, Netherlands.

16 <sup>5</sup> current address: Tropic Health Sciences, Transistorweg 5-C02, 6534 AT Nijmegen,  
17 Netherlands.

18 <sup>6</sup> current address: Leiden Institute of Chemistry, Gorlaeus Laboratories, Leiden University,  
19 2333 CC Leiden, Netherlands.

20 <sup>7</sup> Microspectroscopy Research Facility, Wageningen University & Research, Stippeneng 4,  
21 6708 WE, Wageningen, Netherlands

22

23 § Corresponding authors: Brouns, S.J.J. ([stanbrouns@gmail.com](mailto:stanbrouns@gmail.com), Tel +31 15 2783920),

24 Hohlbein, J. ([johannes.hohlbein@wur.nl](mailto:johannes.hohlbein@wur.nl), Tel +31 317 482635).

25

26 Keywords: CRISPR-Cas, single-particle tracking, target search, Cascade, PAM, single  
27 molecule, photo-activation localization microscopy

28 **Abstract (150)**

29 CRISPR-Cas systems encode RNA-guided surveillance complexes to find and cleave  
30 invading DNA elements. While it is thought that invaders are neutralized minutes after cell  
31 entry, the mechanism and kinetics of target search and its impact on CRISPR protection levels  
32 have remained unknown. Here we visualized individual Cascade complexes in a native type I  
33 CRISPR-Cas system. We uncovered an exponential relationship between Cascade copy  
34 number and CRISPR interference levels, pointing to a time-driven arms race between invader  
35 replication and target search, in which 20 Cascade complexes provide 50% protection. Driven  
36 by PAM-interacting subunit Cas8e, Cascade spends half its search time rapidly probing DNA  
37 (~30 ms) in the nucleoid. We further demonstrate that target DNA transcription and CRISPR  
38 arrays affect the integrity of Cascade and impact CRISPR interference. Our work establishes  
39 the mechanism of cellular DNA surveillance by Cascade that allows the timely detection of  
40 invading DNA in a crowded, DNA-packed environment.

41

42

43 **One sentence summary:**

44 The results from *in vivo* tracking of single CRISPR RNA-surveillance complexes in the native  
45 host cell explain their ability to rapidly recognize invader sequences.

46

## 47 **Introduction**

48 RNA-guided CRISPR-Cas surveillance complexes have evolved to specifically and  
49 rapidly recognize sequences of previously catalogued mobile genetic elements (MGEs)  
50 (Marraffini, 2015). Target DNA recognition depends on CRISPR RNA (crRNA) – DNA  
51 complementarity and on the presence of a protospacer adjacent motif (PAM), a short  
52 nucleotide sequence flanking the target site (Deveau et al., 2008; Mojica et al., 2009). To  
53 work effectively, the complexes need to find their targets fast enough to prevent an MGE  
54 from becoming established in the cell, which can occur within minutes upon cell entry (Shao  
55 et al., 2015). Target search inside a cell faces a multitude of challenges: Firstly, cells are  
56 packed with DNA, and crRNA surveillance complexes need to find the needle in a haystack  
57 before an invading element takes control of the cell. PAM scanning and crRNA-seed  
58 interactions with the target have been suggested to speed up the search process by drastically  
59 reducing the number of potential target sites in the genome (Gleditzsch et al., 2018; Jones et  
60 al., 2017). Several studies have shown that crRNA-effector complexes spend more time  
61 probing PAM rich regions, which is indicative of its function as the first recognition site  
62 (Globyte et al., 2018; Redding et al., 2015; Sternberg et al., 2014). In the *Escherichia coli*  
63 Type I-E CRISPR-Cas system, the crRNA-effector complex Cascade recognizes six PAMs  
64 with high affinity (Leenay et al., 2016) suggesting that Cascade scans hundreds of thousands  
65 of PAM motifs in the host genome, which is only effective when this interaction is  
66 sufficiently fast. A second challenge is posed by the action of other proteins present in the cell  
67 such as DNA binding proteins, DNA or RNA polymerases that may interfere with target  
68 search and formation of target bound crRNA complexes (Jones et al., 2017; Vigouroux et al.,  
69 2018). Some invading MGEs even use specialized anti-CRISPR proteins to inhibit crRNA-  
70 effector complexes and impair the target search process (Bondy-Denomy et al., 2015; Pawluk  
71 et al., 2014). A third challenge that microbes face is to produce appropriate levels of Cascade

72 complexes loaded with one particular crRNA to provide protection against a single invading  
73 element. While adding more and more spacers to CRISPR arrays will have the benefit of  
74 recognizing many invaders, the tradeoff is that long CRISPR arrays will dilute the number of  
75 Cascade complexes loaded with a particular crRNA, potentially decreasing the CRISPR  
76 response against that target. These cellular challenges raise the question how Cascade can  
77 navigate the crowded cell sufficiently fast to find DNA targets, and how many copies of  
78 Cascade are required to do so.

79 Here, we report the visualization of single-molecule Type I-E Cascade complexes in a  
80 native *E. coli* CRISPR-Cas system *in vivo*. We found that the probability of successful  
81 CRISPR protection depends exponentially on Cascade copy numbers, which leads to a time-  
82 driven arms race model between Cascade target search and invader replication. The  
83 localization of Cascade shows the complex is enriched inside the nucleoid. We determined  
84 that 60% of the Cas8e subunit is incorporated into Cascade complexes and that Cascade DNA  
85 probing is very rapid (~ 30 ms) and is driven by Cas8e. Furthermore, transcription of targets  
86 and CRISPR arrays reduce the amount of functional complexes in the cell. Our work sheds  
87 light on target search and dynamical assembly of Cascade complexes in their native cellular  
88 environment, and describes how these processes impact CRISPR protection levels.

89

## 90 **Results**

### 91 **Visualizing Cascade abundance and target search at the single-molecule level**

92 To investigate how microbes deal with these challenges at the cellular level we used a  
93 intracellular single-particle tracking Photo-Activated Localization Microscopy (sptPALM)  
94 (English et al., 2011; Manley et al., 2008), a technique capable of following the movement  
95 and abundance of individual fluorescently-tagged proteins in cells with high precision. By  
96 genetically fusing a photoactivatable fluorescent protein (PAmCherry2, (Subach et al., 2009))

97 to the N-terminus of Cascade-subunit Cas8e (Figure 1A), which was the only subunit for  
98 which labeling had no influence on the CRISPR interference ability of this strain (Figure 1B),  
99 we were able to monitor the mobility and abundance of Cascade complexes in *E. coli* cells.

100

### 101 **Twenty Cascade complexes provide 50% CRISPR protection**

102 We first wanted to link the copy number of Cascade to successful target search, and  
103 established an assay that measures the level of CRISPR protection in cells at the time of cell  
104 entry by a mobile genetic element (MGE). In this assay all Cascade complexes present in the  
105 cell must be able to target the incoming MGE and Cascade target search has to be rate  
106 limiting. To meet the first requirement, we constructed a high copy plasmid (pTarget; Figure  
107 1B) containing target sites for all 18 spacers found in the genomic arrays of *E. coli* K12, such  
108 that all Cascade complexes would be targeting the incoming plasmid. Secondly, we ensured  
109 that Cascade copy numbers were rate limiting (Majsec et al., 2016) by equipping cells with a  
110 low copy plasmid expressing the nuclease Cas3 (pCas3, adapted from (Westra et al., 2010)).

111 We achieved different expression levels of Cascade expression in the cell by tuning  
112 the expression of the native regulator LeuO (Westra et al., 2010) (Figure 1C). The copy  
113 numbers of Cascade were estimated from the number of fluorescent particles present in the  
114 cell under these varying levels of LeuO induction, taking complex assembly (see following  
115 section), growth rate (Table S1) and maturation time of PAmCherry into account (Figure 1D;  
116 Methods). We found that the average number of Cascade complexes per cell in the absence of  
117 LeuO induction was low (~4 copies) and that copy numbers increased more than 30-fold for  
118 the highest induction level (~130 copies). We measured the interference ability under these  
119 conditions by determining the probability that pTarget becomes established in a cell. We  
120 observed that establishment of pTarget decreases sharply with increasing copy numbers of

121 Cascade (Figure 1E). However, even with 130 Cascade complexes present, we still observed a  
122 level of pTarget survival (~0.5%).

123 To explain these observations, we modelled the probability that an invading MGE  
124 becomes established in the cell depending on the number of Cascade complexes that target  
125 this specific MGE. The model is based on multi-copy plasmids and phage systems, where the  
126 DNA clearance is most likely to occur at when an invader enters as a single copy, as the  
127 concentration of invading DNA increases over time. Therefore, depending on the invader and  
128 the level of CRISPR interference, there will be a critical time point ( $t_c$ ) beyond which the  
129 invader is permanently established inside the cell and can no longer be cleared (Severinov et  
130 al., 2016). Our model describes the probability that it takes a certain copy number of proteins  
131 ( $n$ ) each with an average search time ( $\bar{t}_s$ ) to find the target before  $t_c$  is reached. Our model  
132 accurately predicted that pTarget establishment decreases exponentially with increasing copy  
133 numbers of Cascade (Figure 1E, Methods).

134 When we translated these establishment probabilities in interference levels, we could  
135 deduce that around 20 Cascade complexes are required to reach a CRISPR interference level  
136 of 50% (Figure 1F). It becomes very unlikely for the CRISPR system to destroy multiple  
137 genetic copies of the MGE if it has failed to destroy the single copy that was present at the  
138 start before replication. Therefore, we can approximate  $t_c$ , with the replication time of the  
139 plasmid in the absence of copy number control (~3 min, (Olsson et al., 2003a)), which allows  
140 us to retrieve an estimated search time of ~90 minutes for one Cascade complex to find a  
141 single target in the cell (Methods).

142 To summarize, we found a direct relation between the number of Cascade complexes  
143 and the establishment probability of an MGE. The native *E. coli* system requires 20 Cascade  
144 complexes loaded with a cognate crRNA to obtain 50% CRISPR interference levels. This  
145 relation depends on the replication rate of the invading MGE and the average search time of a

146 single complex and demonstrates the importance of rapid target search on CRISPR  
147 interference ability.

148

### 149 **The majority of Cas8e assembles into the Cascade complex**

150 To quantify the dynamics of target search, we traced the diffusion paths of thousands of  
151 individual complexes in the bacterial cell (Figure 2A; Supplementary Video). The apparent  
152 diffusion coefficient  $D^*$ , a measure for mobility, of Cascade was calculated by extracting the  
153 displacement of each fluorescent particle for four consecutive 10 ms steps, allowing us to  
154 investigate the abundance, mobility and behavior of individual complexes and subunits in the  
155 cell. To minimize the influence of spurious autofluorescent particles in *E. coli* (Floc'h et al.,  
156 2018), we used expression levels with the highest estimated Cascade copy numbers (~130  
157 copies, high induction; Figure 1D).

158 To distinguish diffusion of Cascade complexes from monomeric Cas8e subunits, we  
159 first measured the diffusion of the tagged Cas8e fusion protein in a strain lacking genes of the  
160 other four Cascade subunits in the genome (Cas11, Cas7, Cas5, and Cas6e). Based on the role  
161 of Cas8e in non-specific DNA binding (Brown et al., 2018; Jore et al., 2011; Sashital et al.,  
162 2012), we expected to find mobile and DNA-bound populations of Cas8e. However, we were  
163 unable to describe the data accurately by static two-state models of non-interconverting  
164 fractions (Figure S1). We therefore hypothesized that rapid DNA binding and unbinding  
165 events of Cascade on a timescale similar to the framerate (~10-40 ms) would lead to time-  
166 averaging of a mobile state (high  $D^*$  values) and a DNA-bound state (low  $D^*$  values), giving  
167 rise to intermediate  $D^*$  values (Figure 2A and S2). We accounted for these events by  
168 developing a generally applicable analysis method called analytical Diffusion Distribution  
169 Analysis (analytical DDA), which is useful for proteins with fast transitioning kinetics  
170 between states with different diffusion coefficients, such as DNA-interacting proteins. This



171 method allows us to extract quantitative information on DNA binding kinetics (Figure S2),  
172 and enables the study of fast transition rates previously inaccessible to sptPALM (Methods).

173 When we applied the analytical DDA on the Cas8e diffusional data, we retrieved an  
174 average residence time of ~30 ms on DNA and a similar average time spent (~30 ms) rapidly  
175 diffusing ( $D^* \sim 3.5 \mu\text{m}^2/\text{s}$ , as expected for a protein of 82 kDa; Methods), indicating that  
176 Cas8e is bound to DNA for ~50% of the time (Figure 2B). The  $D^*$  distribution of Cas8e then  
177 allowed us to extract the diffusion behavior of the Cascade complex as a whole. We estimated  
178 the fraction of free Cas8e and Cascade-containing Cas8e at 40% and 60%, respectively  
179 (Figure 1D). This finding suggests that Cas8e is produced in excess (Westra et al., 2010) or  
180 somehow involved in a dynamic interaction with the core Cascade subunits (crRNA, Cas11,  
181 Cas7, Cas5, Cas6e) (Jore et al., 2011; Sashital et al., 2012).

182 Surprisingly, we found that the DNA binding kinetics of Cascade were similar to  
183 Cas8e alone, indicating that Cas8e is an important driver of DNA probing characteristics of  
184 the Cascade complex. Furthermore, the DNA probing events take on average ~30 ms and are  
185 thereby considerably faster than the 0.1-10 s that have been reported for *in vitro* studies  
186 previously (Brown et al., 2018; Redding et al., 2015; Xue et al., 2017). As expected, we found  
187 a smaller diffusion coefficient for unbound Cascade complexes ( $\sim 1.0 \mu\text{m}^2/\text{s}$ ) (Methods) due to  
188 their larger size. Together, our analysis shows that more than half of the Cas8e protein  
189 population is part of intact Cascade complexes, and that the DNA interacting behavior of  
190 Cascade is largely determined by the properties of Cas8e.

191 To investigate the role of crRNAs in Cascade complex assembly, we deleted all  
192 CRISPR arrays in the K12 genome ( $\Delta\text{CRISPR}$ ). The resulting diffusion behavior can be  
193 described by fractions of free Cas8e and with Cascade-like diffusion behavior (Figure 2D)  
194 that almost entirely lacks interaction with DNA ( $f_{\text{onDNA}} = 3\%$ ). This indicates that although  
195 Cascade (sub)complex formation does not strictly require the presence of crRNA

196 (Beloglazova et al., 2015; Brouns et al., 2008), Cascade assembly is greatly enhanced by  
197 crRNA. Taken together, the majority of Cas8e proteins are incorporated in Cascade  
198 complexes in the presence of crRNA, and this gives Cascade DNA interacting properties.

199

## 200 **Cascade is enriched but not exclusively present in the nucleoid**

201 Not all potential DNA interaction sites in the host chromosome might be accessible to  
202 Cascade. The host DNA is concentrated in the middle of the cell in the nucleoid and is very  
203 compact which excludes large complexes such as ribosomes (Mondal et al., 2011). Nucleoid  
204 exclusion would reduce the amount of DNA available for scanning and increase the amount  
205 of freely diffusing Cascade complexes. To investigate whether the DNA-bound fraction is  
206 governed by affinity properties of Cascade for DNA rather than a restricted search space  
207 outside the DNA-containing nucleoid region, we studied the spatial distribution of Cascade  
208 localizations. Nucleoid-excluded ribosomes are enriched away from the central long axis of  
209 the cell (Sanamrad et al., 2014). For Cascade, we found a homogeneous spatial distribution  
210 throughout the cell (Figure 3A), indicating that Cascade is small enough to freely scan the  
211 nucleoid for target sites.

212 We furthermore used the spatial distribution of Cascade to extract quantitative  
213 information on the DNA-bound fraction. To that purpose, we created a DNA-free  
214 environment in the cell by adding cephalixin (Reyes-Lamothe et al., 2014). This antibiotic  
215 affects cell wall synthesis and causes cells to elongate, forming DNA-free cytoplasmic space  
216 between nucleoids without condensing the nucleoid (Figure 3B). The time Cascade is bound  
217 to DNA is inherently linked to the relative amount it spends in DNA-free and DNA  
218 containing regions. Therefore, by calculating the relative amount of localizations in both  
219 regions (Enrichment Factor; *EF*) we can extract the fraction of time spent on DNA  
220 independently from the DDA analysis. Cascade was only moderately enriched (*EF* of  $1.8 \pm$

221 0.2 fold) in the nucleoid regions (Figure 3C), indicating that Cascade spends a considerable  
222 amount of time diffusing in the cytoplasm while not associated with DNA. From the  
223 enrichment factor, the fraction of Cascade complexes bound to DNA can be approximated to  
224 45% (Figure 3D; for derivation see Methods). This value is consistent with the ~ 50% value  
225 we extracted from the DDA distribution of Cascade (Figure 2C). However, it strongly  
226 contrasts other DNA binding proteins such as Fis and RNA polymerase, which show a much  
227 higher nucleoid enrichment (Reyes-Lamothe et al., 2014; Stracy et al., 2015). The above  
228 findings indicate that Cascade inherently spends more time freely diffusing the cell and that  
229 this is caused by the nature of DNA-Cascade interactions and not by size-based nucleoid  
230 exclusion, as is the case for ribosomes (Sanamrad et al., 2014). Therefore, we decided to  
231 study the nature of the DNA interactions in more depth.

232

### 233 **Cascade-DNA interactions are not only PAM-dependent**

234 Next, we assessed how PAM interactions contributed to DNA binding by introducing  
235 mutation G160A in the Cas8e subunit which abolishes the interaction with the PAM (Hayes et  
236 al., 2016). This G160A mutation decreased the fraction of DNA-bound Cascade from  $41 \pm 11$   
237 to  $28 \pm 6\%$  (Figure 4A) without fully inhibiting DNA binding, suggesting that PAM-  
238 independent interactions (Van Erp et al., 2015; Hayes et al., 2016; Xiao et al., 2017) play a  
239 role in DNA probing as well. To assess the contribution of these different types of interactions  
240 to the average DNA residence time found previously, we measured the persistence of  
241 Cascade-DNA interactions by increasing the dark time between exposures (Figure 4B). Our  
242 data showed that sustained binding events at longer time scales (100 – 250 ms) were more  
243 frequently observed for WT Cascade than for the PAM binding mutant complex Cascade-  
244 Cas8e<sub>G160A</sub> (Figure 4C). Together with the increased off-rate of the mutated complex (Figure

245 4A), this finding demonstrates that PAM-dependent interactions of Cascade with DNA last  
246 longer than PAM-independent interactions.

247

### 248 **Target DNA binding is influenced by the cellular environment**

249 After establishing intrinsic DNA probing characteristics of Cascade, we next  
250 investigated its diffusion behavior in the presence of targets (Figure 5). To prevent target  
251 DNA degradation by Cas3 nucleases, we deleted the *cas3* gene and verified that the deletion  
252 did not alter Cascade diffusion behavior (Figure S3). To verify that all Cascade complexes  
253 could bind a target, we measured the copy number of pTarget to be ~ 400 copies/cell (Figure  
254 S4). As the native *E. coli* CRISPR arrays contain 18 spacers, this resulted in ~7000 target sites  
255 per cell which far outnumbers Cascade copy numbers under our growth conditions (~130,  
256 Figure 1D).

257 Compared to a non-targeted control plasmid (Figure S3), the introduction of pTarget  
258 in cells decreased the fraction of free Cascade complexes (from  $60 \pm 4$  to  $29 \pm 3\%$ ), and gave  
259 rise to a  $34 \pm 2\%$  immobile, target-bound Cascade fraction ( $D_{\text{Cascade}(\text{bound})}^* = 0.06 \mu\text{m}^2/\text{s}$ )  
260 (Figure 5A). As expected, addition of pTarget increased the persistence of sustained binding  
261 events, indicating specific DNA target binding (Figure 5C). The combined information of  
262 plasmid copy number and the fraction bound Cascade enabled us to determine a cellular  $K_D$   
263 value for the affinity of Cascade for targets of ~180 nM (Figure 5F; Methods), indicating that  
264 the affinity *in vivo* is around 10 times lower than what has been observed *in vitro* (Hayes et  
265 al., 2016).

266 We hypothesized that transcription of DNA along target sites would be one of the  
267 main factors influencing Cascade target DNA binding. To investigate the effects of  
268 transcription by host RNA polymerase (RNAP), we introduced a (lac) promoter in front of the  
269 pTarget sequence. To our surprise, we observed that the affinity of Cascade for target sites

270 that undergo transcription (~100 nM) was higher than for non-transcribed target sites (~180  
271 nM). In addition, we observed an increased fraction of free Cas8e subunits (from  $37 \pm 2\%$  to  
272  $54 \pm 2\%$ ) in the strain containing transcribed pTarget (Figure 5B). Collectively, these findings  
273 suggest that transcription of a target DNA sequence somehow facilitates target search and  
274 increases the affinity of a target. In addition, it appears that collisions of RNAP with target-  
275 bound Cascade result in changes in the Cascade assembly, likely by dissociation of the Cas8e  
276 subunit from the complex upon collision with RNA polymerase, which potentially dissociates  
277 Cascade from the target.

278 The relatively dynamic association of Cas8e within the Cascade complex has been observed  
279 previously *in vitro* (Jore et al., 2011) and was more recently also observed upon binding to the  
280 CRISPR array (Jung et al., 2017). We hypothesized that this dynamic behavior might be a  
281 functional characteristic and will also occur upon encountering CRISPR arrays inside the cell.  
282 To test this hypothesis, we made a variant of pTarget where all 18 interference PAMs were  
283 replaced by the trinucleotide sequence matching the repeats of the CRISPR array  
284 (pCRISPR1). Cascade did not show any interaction with the non-transcribed pCRISPR1  
285 plasmid (Figure 5D). However, when we added a promoter sequence in front of the  
286 pCRISPR1 array of targets, we observed moderately enhanced levels of free Cas8e (from  $40 \pm$   
287  $1$  to  $56 \pm 1\%$ ) (Figure 5E), reminiscent of Cas8e expulsion from the complex upon collision  
288 with RNA polymerase, or from targets with repeat like PAMs (Jung et al., 2017). Effectively  
289 this shows that transcribed CRISPR arrays may function as target decoys in the cell and can  
290 therefore potentially influence the levels of functional Cascade complexes in the cell.

291 To test whether CRISPR array really form decoys in the cell and could impact  
292 interference levels, we constructed a compatible high copy number plasmid pCRISPR2  
293 containing a normal CRISPR array (Figure S5). While the introduction of pCRISPR2 into  
294 cells containing pTarget only led to a small decrease in the number of Cascade complexes

295 (15% less) (Figure S3), the CRISPR interference levels were reduced by as much as 50%  
296 (Figure 5G). This effect was not observed with low copy variant of pCRISPR2  
297 (pCRISPR2\_LC) or with a high copy plasmid lacking CRISPR arrays (pControl), indicating  
298 that this effect comes from the presence of a large number of CRISPR arrays in the cell  
299 (Figure 5G). We further found that the observed impact of CRISPR arrays on Cascade copy  
300 number and interference level fits well with our previously predicted relation between  
301 Cascade copy numbers and probability of successful MGE establishment (Figure 5H). It  
302 furthermore demonstrates how relatively small changes in Cascade copy numbers (15%) can  
303 have a big impact on CRISPR interference levels (50%). Taken together, our data indicate  
304 that Cascade target search and binding is strongly influenced by the action of RNA  
305 polymerase and that CRISPR arrays form target decoys in the cell, which can affect CRISPR  
306 interference levels.

307

## 308 **Discussion**

309 How crRNA-effector complexes can achieve timely detection of incoming mobile  
310 genetic elements in the crowded environment of the cell is an intriguing aspect of CRISPR  
311 biology that remains poorly understood. We provide first insights into the fundamental  
312 kinetics of the surveillance behavior of type I crRNA-effector complexes in their native  
313 cellular environment. We determined how many copies of Cascade are required to establish  
314 effective immunity and uncovered how Cascade complexes navigate the crowded bacterial  
315 cell packed with DNA. Our results indicate that Cascade does not restrict its search space to  
316 parts of the cell, for example the nucleoid-free periphery, but instead is occupied scanning the  
317 entire host nucleoid for a match. To cover this vast sequence space sufficiently fast, the  
318 Cascade complex interrogates DNA sequences by using a combination of PAM-dependent  
319 and PAM-independent interactions which on average last only 30 ms. This probing interaction

320 is much faster than previously reported interaction times determined of type I Cascade  
321 complexes by *in vitro* methods, which range between 0.1 and 10 s (Brown et al., 2018;  
322 Redding et al., 2015; Xue et al., 2017). The ability to rapidly probe DNA sequences for  
323 potential matches with the crRNA, and to move from one place in the nucleoid to the next,  
324 may explain how a relatively low number of Cascade complexes in *E. coli* may still confer  
325 CRISPR immunity. Interestingly, the average probing time of 30 ms for Cascade matches  
326 values found for *Streptococcus pyogenes* dCas9 in *E. coli* (Jones et al., 2017; Martens et al.,  
327 2018), suggesting that DNA probing interactions of crRNA-effector complexes from both  
328 Class I and II systems may have evolved independently to take place at this time scale and  
329 may .

330         Given the hundreds of thousands of PAMs in the host DNA, this interaction time  
331 would lead to a search time in the order of hours. This value matches our independently  
332 calculated estimate of 1.5 hours for a single Cascade to find a single DNA target in the cell,  
333 which is four times faster than dCas9 search time estimates of 6 hours (Jones et al., 2017).  
334 However, our data also indicates that Cascade not only probes PAMs, the complex also  
335 spends a considerable amount of time engaged in PAM-independent DNA interactions. These  
336 might be constituted by direct crRNA – DNA interactions (Blosser et al., 2015; Xue et al.,  
337 2016), or electrostatic interactions of Cascade with the DNA (Van Erp et al., 2015;  
338 Hochstrasser et al., 2014). This suggests an even larger DNA sequence space needs to be  
339 covered, creating the need for even more efficient and functionally flexible surveillance  
340 solutions. This more flexible probing behavior would be required to recognize targets with  
341 mutations in the PAM or protospacer in order to trigger a CRISPR memory update pathway  
342 called priming (Datsenko et al., 2012; Jackson et al., 2017), which appears to be unique for  
343 type I CRISPR-Cas systems.



344           One possibility to reconcile Cascade DNA probing characteristics to the overall search  
345 time could be that Cascade undergoes facilitated 1D DNA sliding, where Cascade probes  
346 multiple sites per DNA binding event. We have shown that Cascade spends 50% of its search  
347 time on DNA, and the other 50% diffusing to a new site in the cytoplasm. This value may  
348 seem low compared to other DNA interacting proteins such as transcription factor LacI,  
349 which is DNA bound for 90% of the time (Elf et al., 2007). However, 50% has been  
350 theoretically derived as the optimum for a target search process involving one dimensional  
351 DNA sliding and 3D translocation/hopping (Slutsky and Mirny, 2004). Indeed, recently it has  
352 been shown *in vitro* that Cascade and Cas9 can slide along the DNA in search of targets  
353 (Brown et al., 2018; Globyte et al., 2018). If this also occurs *in vivo*, this would be a striking  
354 example of a DNA binding protein having an optimized time division between DNA-bound  
355 and freely mobile states to survey the DNA content of the cell.

356           The relatively high abundance (50%) of freely diffusing Cascade complexes may have  
357 benefits as well, as this will lead to more Cascade complexes in the periphery of the cell  
358 outside of the nucleoid. By surveying these peripheral regions more frequently, Cascade may  
359 be able to detect incoming bacteriophage or plasmid DNA more rapidly when these genetic  
360 elements enter the cell.

361           Besides the chromosomal host DNA, other cellular constituents also affect target DNA  
362 binding properties. We found a much higher  $K_D$  value *in vivo* (180 nM) than was reported  
363 earlier using *in vitro* methods (20 nM) (Hayes et al., 2016). The discrepancy in binding  
364 affinity between *in vivo* and *in vitro* measurements may be caused by an increase in target  
365 search time (i.e. a lower on-rate) or an increase in target dissociation rate (i.e. a higher off-  
366 rate) *in vivo*. In any scenario, this discrepancy highlights the strong role of the crowded  
367 cellular environment on target binding.



368 Counterintuitively, we have found that Cascade binds transcribed target sites with  
369 higher affinity (100 nM) than non-transcribed target sites (180 nM). Previous studies have  
370 shown that negative-supercoiling is required for Cascade binding (Westra et al., 2012), and  
371 that increased negative super-coiling accelerates the rate of R-loop formation (Szczelkun et  
372 al., 2014). As transcribed regions cause more negative supercoiled regions in the DNA (Ma  
373 and Wang, 2016), this could explain the increase in the affinity for transcriptionally active  
374 sites. Rates of spacer acquisition were also found to be higher for transcriptionally active  
375 regions (Staals et al., 2016), so together these effects may influence the abundance and  
376 effectivity of spacers in nature.

377 Next to the positive effect of transcription on target search, we have also found that  
378 collisions between RNAP and target-bound Cascade lead to Cascade disassembly, where the  
379 Cas8e subunit is expelled from the Cascade core. Furthermore, also CRISPR arrays  
380 themselves can trigger Cascade disassembly, indicating they form target decoys in the cell.  
381 When present at high copy number, CRISPR arrays can even impact CRISPR interference  
382 levels (Fig. 5G). The loose association of Cas8e with the core Cascade complex as observed  
383 *in vitro* (Jore et al., 2011), might serve a biological role in cells to recycle Cascade from off-  
384 targets including the CRISPR array, and may prevent Cas3 recruitment and subsequent self-  
385 targeting (Xiao et al., 2018).

386 By measuring cellular copy numbers, and accurately measuring CRISPR interference  
387 levels, we could uncover an exponential relationship between the number of Cascade  
388 complexes in the cell and CRISPR interference. This relationship describes that every 20  
389 Cascade complexes loaded with one crRNA can provide 50% more protection from an  
390 invading DNA element (i.e. 20 copies provide 50%, 40 copies 75% protection). Therefore at  
391 constant Cas protein production and degradation levels, the effective concentrations of  
392 Cascade complexes loaded with one type of crRNA will become diluted when CRISPR arrays

393 become longer. The size of the CRISPR array is therefore a tradeoff between the higher  
394 protection levels of a few spacers, and lower protection levels of many spacers. With our  
395 findings we can test optimality of this tradeoff under different conditions and help explain the  
396 observed sizes of CRISPR arrays found in nature (Martynov et al., 2017).

397         The initial entry is the most vulnerable time for the invader, but invading MGEs have  
398 the possibility to outrun CRISPR-Cas immunity by replicating faster than being found. In the  
399 native cellular environment, we have found that scanning of host DNA, binding to CRISPR  
400 arrays and encountering transcribing RNA polymerases can prevent Cascade from finding the  
401 target before the critical time ( $t_c$ ) is reached and the invader is permanently established  
402 (Figure 6). We therefore hypothesize the presence of a kinetic arms race, in which invaders  
403 have evolved to replicate increasingly fast upon cell entry, while CRISPR-systems have  
404 evolved to increase the rate at which they are able to find the target. A recent study has indeed  
405 shown that the replication rate of foreign elements affects CRISPR interference levels  
406 (Høyland-Kroghsbo et al., 2018). Many bacteriophages use a two-stage injection (Chen et al.,  
407 2018; Davison, 2015), which may have evolved to limit the amount of time their DNA is  
408 exposed to intracellular defense mechanisms, while already allowing the production of  
409 proteins to replicate phage DNA, control host takeover, or to inhibit host defense (e.g. anti-  
410 CRISPR proteins) (De Smet et al., 2017). It has been previously shown that the host can  
411 counter this strategy by selectively targeting early injected DNA regions, maximizing the time  
412 available to look for targets (Modell et al., 2017).

413         Our mathematical description of CRISPR interference can be adapted to natural  
414 environments in which the growth rates are orders of magnitude slower than under laboratory  
415 conditions. Furthermore, the target search equations established here could be expanded to the  
416 population level, allowing to model how individual variability in Cascade expression levels  
417 and growth rates can impact the survival of entire populations. Therefore, our data provides

418 an important framework for further quantitative cellular studies that will address how  
419 CRISPR systems optimally deal with the challenges of cost-effective and rapid target search.  
420

421 **Figures**

422

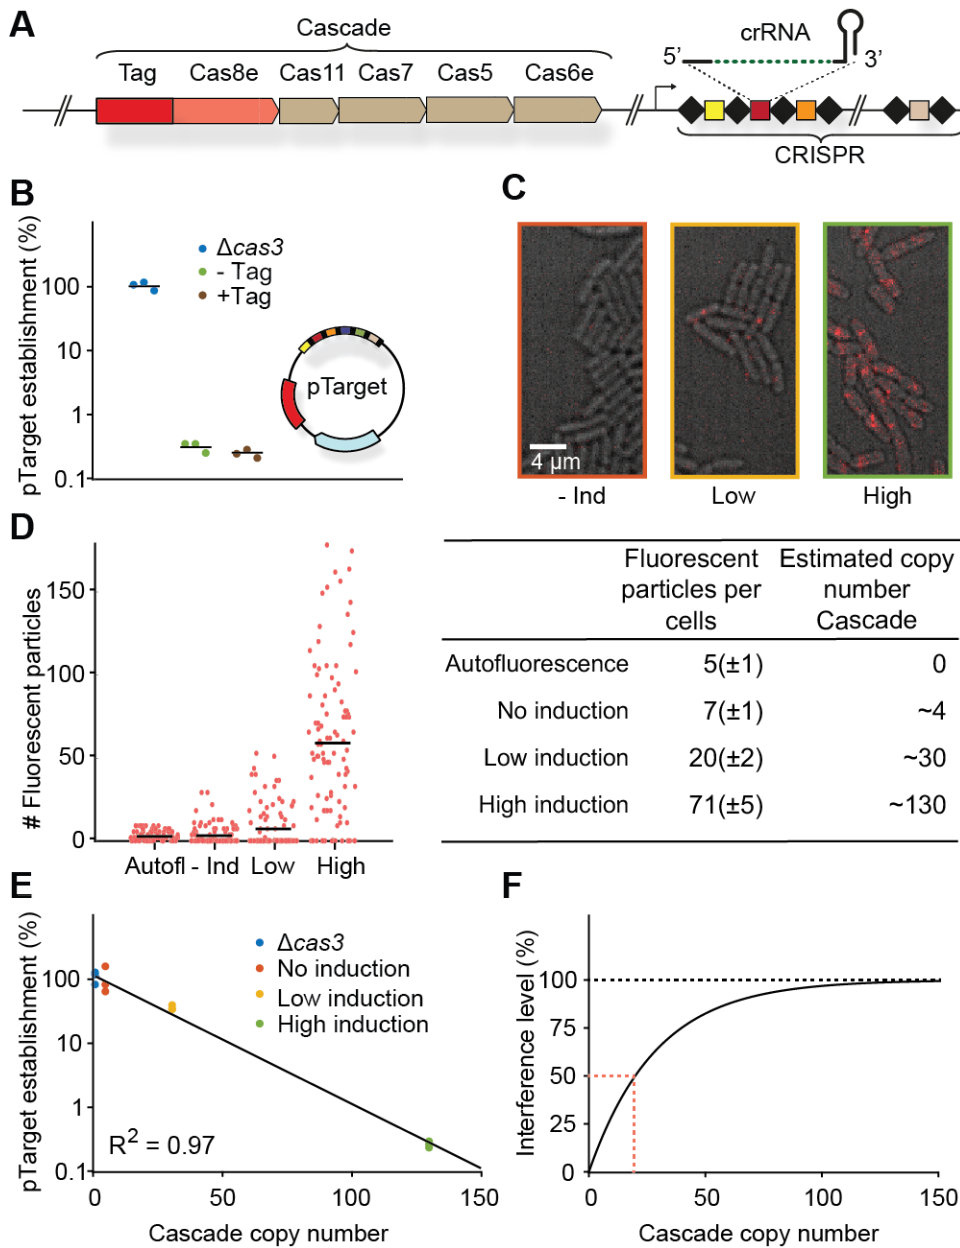

423

424 **Figure 1: Cascade copy number vs CRISPR protection.** (A) Chromosomal locus of the

425 Cascade subunits and integration site of the photoactivatable fluorescent protein upstream of

426 *cas8e*. (B) pTarget establishment, calculated from the ratio of transformation of

427 pTarget/pGFPuv, is a measure for the interference level of the CRISPR system. To test

428 whether tagged Cascade complexes were able to function normally, we compared the tagged

429 strain to the untagged and the  $\Delta cas3$  strain. pTarget (bottom right) contains protospacers for

430 all spacers in the K12 genome (colored, not all depicted) and are flanked by a 5'-CTT-3'  
431 PAM (black bars). (C) Overlay of brightfield image of cells (grey) and single molecule signal  
432 (red) from a single representative frame for different induction levels. (D) Number of  
433 fluorescent particles measured in each cell plotted for different levels of Cascade expression  
434 (left). The mean number of fluorescent particles ( $\pm$  standard deviation; table left column) was  
435 converted to a Cascade copy number (table right column, Methods). (E) pTarget  
436 establishment plotted for different copy numbers of Cascade. The data points were fitted with  
437 an exponential decay function.  $pTarget\ establishment = e^{-an}$ , where  $n$  equals Cascade  
438 copy number and  $a$  the fitted coefficient. In our model  $a = \bar{t}_s/t_c$ . (F) The fitted exponential  
439 decay fitted on the left converted into an interference level ( $Interference\ level = 1 -$   
440  $pTarget\ establishment$ ). Indicated in red (dashed) is the amount of Cascade copies  
441 required for 50% interference.  
442

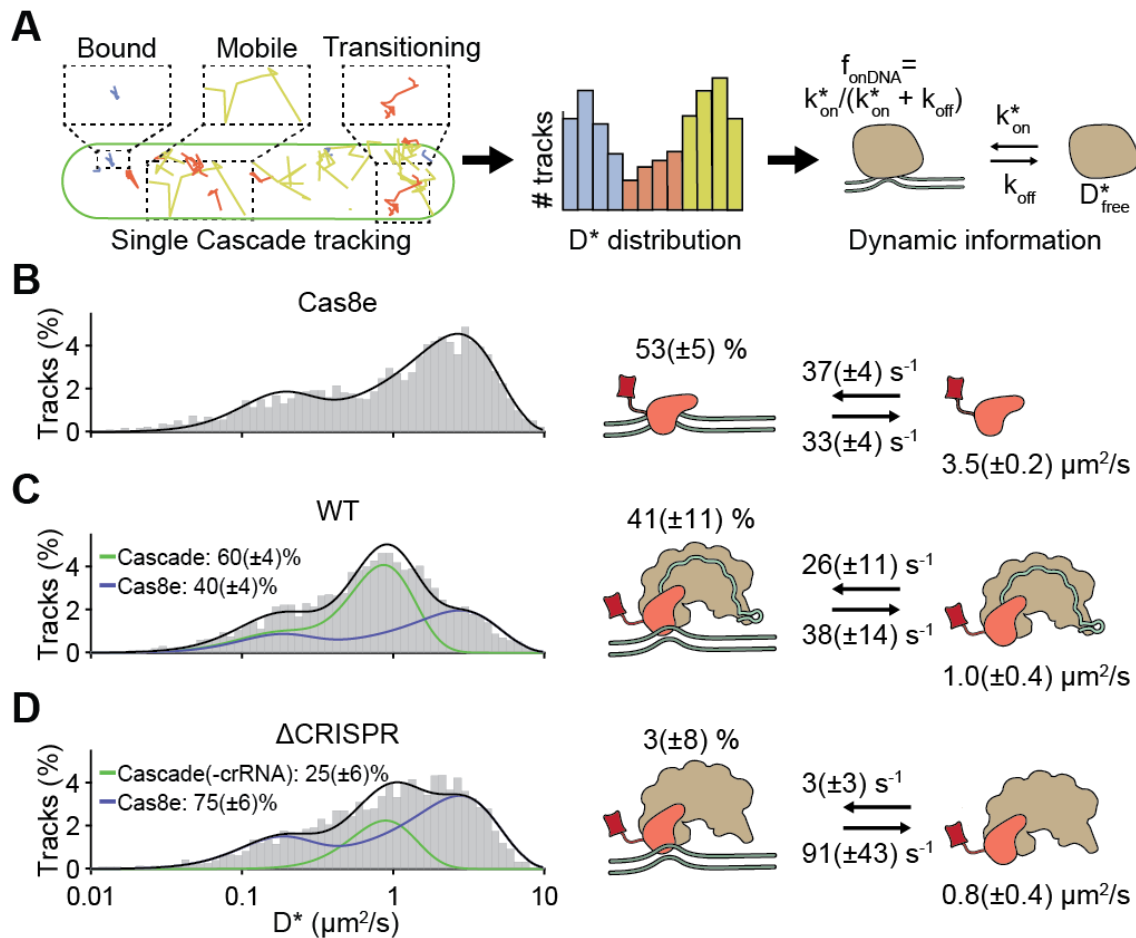

443

444

**Figure 2: Diffusion behavior of Cas8e and Cascade.** (A) Tracks recovered from a single

445

cell of the WT strain (left). Proteins can be bound to DNA (blue), be freely diffusing (yellow)

446

or transitioning between bound and mobile states (orange) within a track. The analytical

447

diffusion distribution analysis (DDA; right) extracts kinetic information (pseudo-first order

448

on-rate ( $k_{\text{on}}^*$ ), off-rate ( $k_{\text{off}}$ ) and the apparent free diffusion coefficient ( $D_{\text{free}}^*$ ) from  $D^*$

449

distributions, which further allows the calculation of fraction DNA bound ( $f_{\text{onDNA}}$ ). (C-E)  $D^*$

450

distributions for (B) Cas8e, (C) Cascade and (D) ΔCRISPR strain. Total (black), Cas8e (blue)

451

and Cascade (green) fractions fits are indicated by lines. Parameters for Cas8e (B) and

452

Cascade (C-D) are depicted on the right. Parameters from (B) were used to fit the Cas8e

453

fraction in (C) and (D). Error estimation is based on bootstrapping ( $\pm$  standard deviation). See

454

also Figure S1 and S2.

455

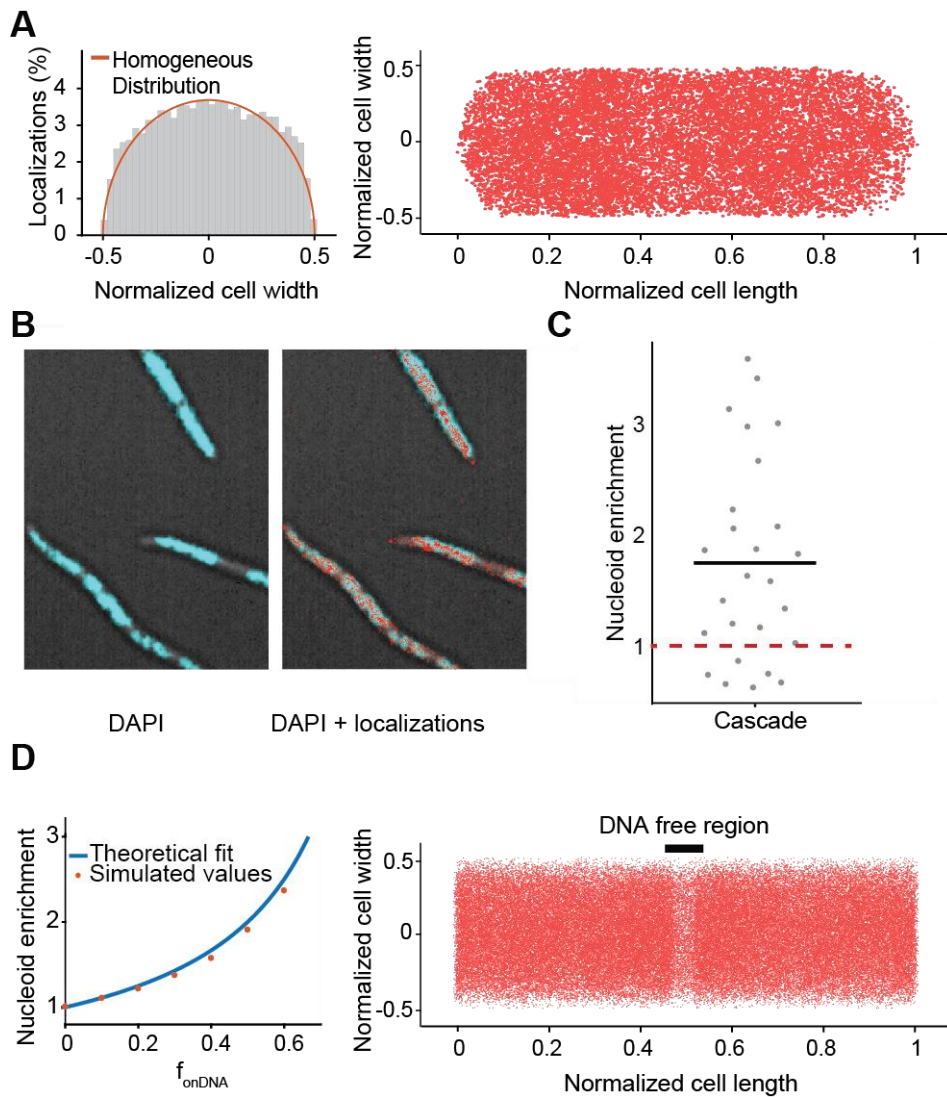

456

457 **Figure 3: Cascade localization inside the cell. (A)** Localization of Cascade in the cell. Left:

458 Distribution of Cascade over the cell width of the cell from Cascade (n = 33 cells; 15428

459 localizations): in orange is indicated the expected distribution in case of a homogeneous

460 localization within the cell. Right: same localizations plotted within dimensions of single cell

461 in which the cell length and cell width of each cell was normalized. **(B)** Overlay of DAPI

462 fluorescence and brightfield image (left) with Cascade localizations (right) in cephalaxin

463 treated cells. **(C)** The nucleoid enrichment in WT strain (27 subregions in 18 cells). The

464 average ratio is indicated with a black bar. The expected ratio if Cascade has no interaction

465 with DNA is indicated in red (dashed). **(D)** Relation between DNA bound fraction and

466 nucleoid enrichment. Left: A theoretical relation between nucleoid enrichment and DNA

467 bound fraction was derived (Methods) and compared to simulated values for different  
468 amounts of  $f_{\text{onDNA}}$ . Right: Localizations of simulated Cascade proteins ( $n = 50.000$ ) diffusing  
469 through part of an elongated cell are plotted on top of long cell axis. A DNA-free region  
470 (black bar) is visible due to enrichment of Cascade binding to DNA in nucleoid regions.  
471 Simulations of particles were performed with off-rate of  $38 \text{ s}^{-1}$  and an on-rate of  $26 \text{ s}^{-1}$  to  
472 reach a nucleoid enrichment of 1.8, similar to the average that was found for Cascade.  
473



474

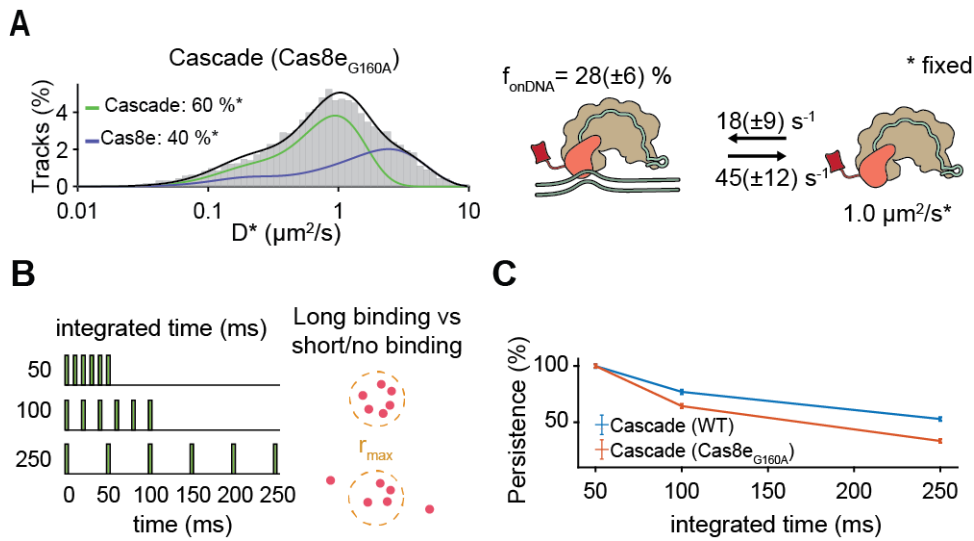

475

476

477

**Figure 4: PAM-dependent and PAM-independent DNA probing. (A)**  $D^*$  distributions for

478 Cascade and Cas8e with a mutation (G160A) deficient in PAM binding. To compare kinetic

479 rates, we assumed that the relative Cas8e-Cascade fractions and the diffusion of free Cascade

480 and Cas8e were not altered by the mutation and those values were fixed. **(B)** The relative

481 amount of long binding events (6 consecutive localizations within  $r_{\text{max}}$ : 1 pixel (0.128  $\mu\text{m}$ ) of

482 the mean position) for WT and PAM binding mutant Cascade normalized to 50 ms integration

483 time. Error estimation in (A) and (C) is based on bootstrapping ( $\pm$  standard deviation).

484

486  
487

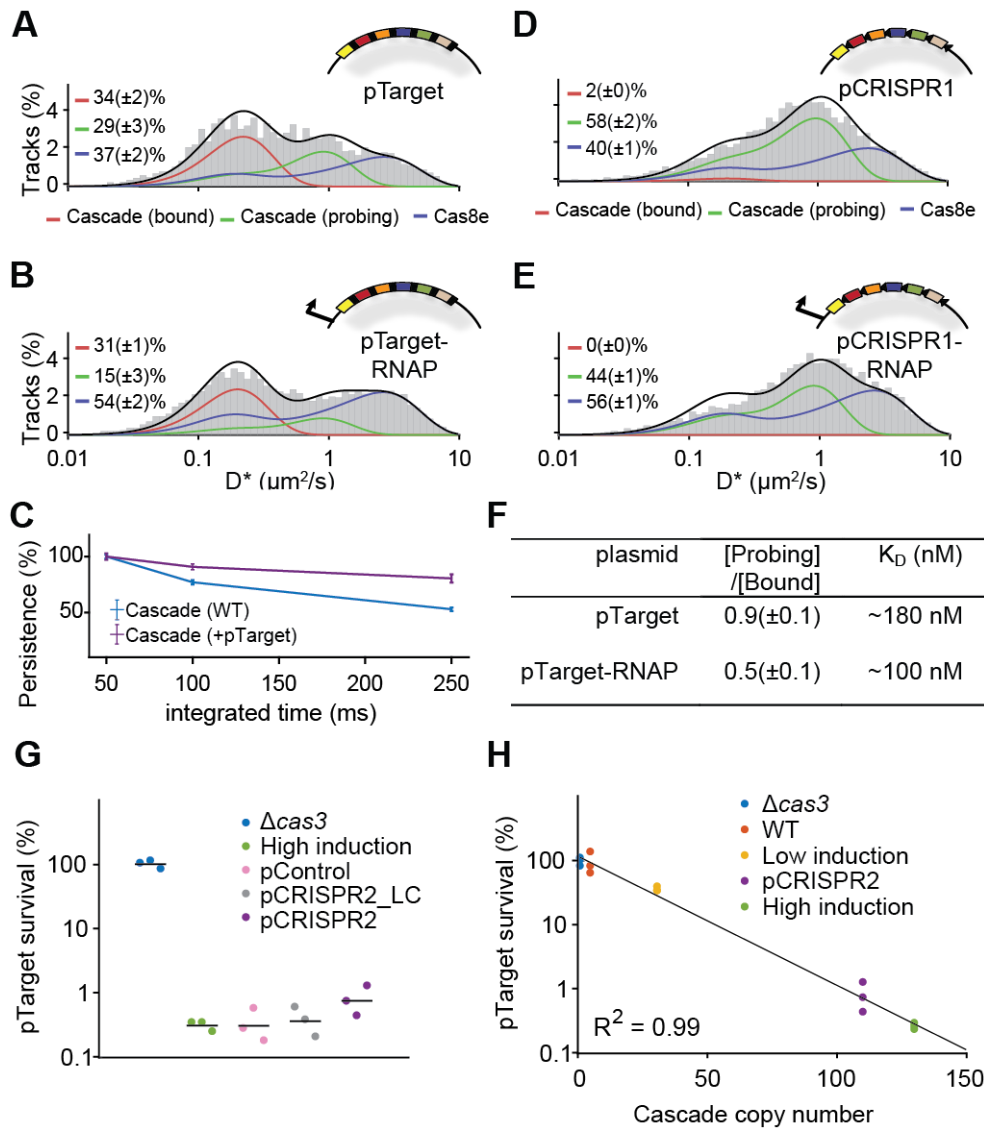

488

489 **Figure 5: Cascade - DNA interactions in the presence of targets.** (A and B),  $D^*$   
 490 distribution for the  $\Delta cas3$  strain carrying pTarget (A) and pTarget-RNAP (B). pTarget  
 491 contains protospacers for all spacers in the K12 genome (colored, not all depicted) and are  
 492 flanked by a 5'-CTT-3' PAM (black bars). Cascade (probing) (green) and Cas8e (blue)  
 493 fractions were fitted with parameters from Figure 1C and 1D, and a new target-bound  
 494 (Cascade (bound)) was introduced as a single diffusion state ( $D^* = 0.06 \mu\text{m}^2/\text{s} + \sigma^2/t$ ); red).  
 495 (C) The abundance of sustained binding events as in Figure 3C, but for WT and pTarget-  
 496 carrying cells. (D and E),  $D^*$  distribution for the  $\Delta cas3$  strain carrying pCRISPR1 (D) and  
 497 pCRISPR1-RNAP (E). pCRISPR1 contains the same protospacers as pTarget that are now

498 flanked by repeat PAMs. (F) *In vivo*  $K_D$  estimates based on the ratio between Probing/Bound  
499 Cascade and the plasmid copy number (Figure S5; Methods). (G) pTarget establishment for  
500 *Δcas3* (blue), WT (high induction; green), an empty high copy plasmid (pControl; pink), and  
501 low or high copy plasmids carrying CRISPR arrays (pCRISPR2\_LC/pCRISPR2;  
502 grey/purple). Each dot represents an independent biological replicate. (H) pTarget  
503 establishment plotted for different copy numbers of Cascade. Same as Figure 1E but with  
504 addition of pCRISPR2. The Cascade copy number of the pCRISPR2 strain was estimated  
505 from the relative abundance of the Cascade (probing) fraction in the WT (high induction;  
506 Figure 2C) and pCRISPR2 (Figure S4) strain. Each dot represents an independent biological  
507 replicate. Error estimation in (A-F) is based on bootstrapping ( $\pm$  standard deviation).  
508 See also Figure S3, S4 and S5.  
509

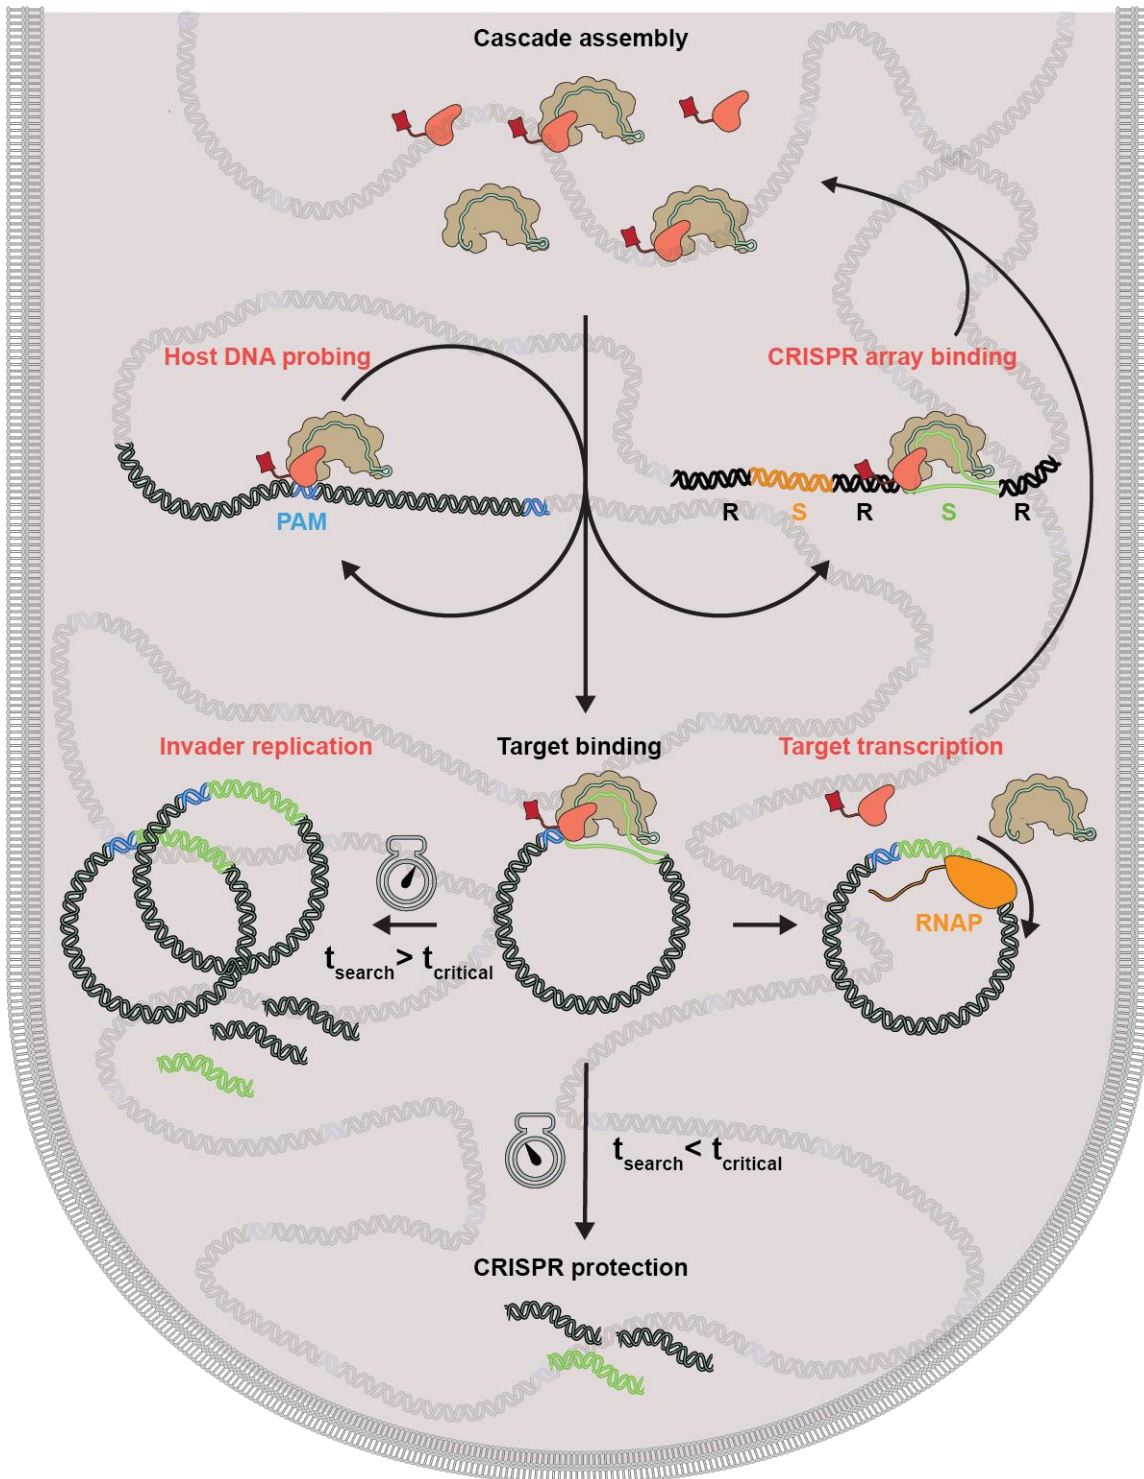

510

511 **Figure 6: Model of how Cascade protects the cell.** Successful protection against an invader

512 requires Cascade target search to circumvent several potential diversions (red). After Cascade

513 is assembled, the complex probes the host DNA by rapidly binding and dissociating. It uses

514 PAM-dependent and PAM-independent DNA interactions and scans the entire nucleoid

515 region. If it binds to a CRISPR array (S: spacer; R: Repeat), the complex disintegrates. When

516 it has found its target, it depends on the search time ( $t_{search}$ ) and the critical time ( $t_{critical}$ )  
517 whether the invader is cleared and the cell protected, or the invader can replicate and establish  
518 itself in the cell. Moreover, transcription by RNA polymerase (RNAP) can still remove bound  
519 complexes, compromising CRISPR protection.

520 **Methods**

521

522 **Cloning**

523 The inserts to create pTarget and pCRISPR1 plasmids were purchased as synthetic constructs  
524 from Gen9 (pTarget insert and pCRISPR1 insert; Table S3). To increase the copy number of  
525 targets in the cell, the constructs were cloned into a pUC19 backbone with XbaI and KpnI  
526 restriction sites, yielding pTarget-RNAP and pCRISPR1-RNAP. The lac promoter was  
527 removed for both plasmids by digestion with SalI and PciI, creating blunt ends with Klenow  
528 Fragment and subsequently religated to yield pTarget and pCRISPR1. CRISPR arrays were  
529 amplified from the K12 BW25113 strain (primers BN383 and BN384; BN370 and BN385 for  
530 CRISPR array 2.1 and 2.3 respectively) and cloned into pJPC-12 plasmid containing the  
531 pSC101 ori with KpnI and SalI sites (for CRISPR array 2.1) and SalI and EcoRV sites (for  
532 CRISPR array 2.3). The copy number of the plasmid could be varied by introducing  
533 mutations in the *repA* gene with site-directed mutagenesis PCR (BN373-375). The E96R  
534 mutation of RepA yields a reported copy number of ~240/cell (pCRISPR2) compared to the  
535 WT RepA (pCRISPR2\_LC) copy numbers of ~7/cell (Peterson and Phillips, 2008). A plasmid  
536 was made from the high copy-variant that did not contain any CRISPR arrays (pControl). All  
537 constructs were verified by sequencing.

538

539 **Recombination**

540 The strains used in this study were created by using Lambda red recombineering (Datsenko  
541 and Wanner, 2000). Strains harboring the pSC020 plasmid that contains both the Lambda red  
542 recombinase and Cre-recombinase were grown at 30 °C. Before transformation of an insert  
543 containing an antibiotic resistance marker, the expression of Red recombinase was induced  
544 with 0.2% L-Arabinose. Colonies on the specific antibiotic plate were verified with PCR and  
545 sequencing and subsequently Cre recombinase expression was induced with 1 mM IPTG at 37

546 °C to promote plasmid and antibiotic resistance gene loss. The strain was subsequently patch  
547 plated to screen for resistance sensitivity due to plasmid loss.

548 If the scar that is left after lox-site recombination is directly upstream or downstream of a  
549 gene it might influence gene transcription/termination. In the design of constructs for  
550 *pamcherry2* (Subach et al., 2009) the lox-*cat*-lox sequence was placed upstream of the IGR  
551 (Intergenic region) that is present between *cas3* and *cas8e*. To allow for correct termination of  
552 *cas3*, a part of the IGR was also added at the 5' end of the antibiotic resistance marker. The 3'  
553 flank of the constructs overlapped with the *cas8e* gene. The 5' flank of the constructs matched  
554 a sequence upstream and downstream of *cas3* (PAmCherry ins; Table S3). Amplification of  
555 the constructs with a forward primer matching the downstream region kept *cas3* intact upon  
556 insertion (BG7128), whereas a primer matching the upstream region deleted the *cas3* gene  
557 allowing measurements in the presence of targets (BG7129). The insert also contained a part  
558 of the *cas8e* sequence containing a G160A mutation. This mutation could be introduced into  
559 the gene simultaneously with the fluorescent protein, depending on the reverse primer that  
560 was used for insert amplification (BG7130 for WT, BG7131 for G160A).

561 Knockouts of the CRISPR arrays and Cas gene subunits of the K12 strain were made by  
562 amplifying a lox-*kan*-lox or lox-*cat*-lox sequence with flanks matching the specific sequences  
563 and introducing them into the strain as described above (BG7366+BG7367 for CRISPR array  
564 2.1; BG7368+BG7369 for CRISPR array 2.2+2.3; BG8366+BG8367 for  $\Delta(\textit{cas11-cas6e})$ ). A  
565 full overview of the sequences of these inserts is given in Table S3.

566

## 567 **Growth conditions**

568 To prevent the high-copy target plasmids from influencing the growth rate of the strains and  
569 therefore changing the fraction of matured PAmCherry complexes we used a rich defined  
570 medium with minimal autofluorescence. Strains were grown in M9 minimal medium



571 containing the following supplements: 0.4% glucose, 1x EZ amino acids supplements (M2104  
572 Teknova), 20 µg/ml uracil (Sigma-Aldrich), 1mM MgSO<sub>4</sub> (Sigma-Aldrich) and 0.1 mM  
573 CaCl<sub>2</sub> (Sigma-Aldrich) (further referred to as M9 medium). Strains were inoculated o/n from  
574 glycerol stocks and 200x diluted in fresh medium the next day. Cells were always grown with  
575 the required antibiotics. The expression level of Cascade for strains carrying the pKEDR13  
576 plasmid could be tuned by different expression levels of LeuO. The expression level referred  
577 to in the text as low induction was achieved by leaky expression of LeuO (no addition of  
578 IPTG), whereas high induction was achieved by addition of 1 mM IPTG upon dilution of the  
579 o/n culture. For all sptPALM measurements the high induction condition was used. The cells  
580 were grown for ~2.5 hours to an OD of 0.1 before use. For enforced elongation of cells,  
581 cephalixin (40 µg/ml) was added 0.5 hour after fresh inoculation and grown for two more  
582 hours. When required, DAPI for staining of DNA was added right before imaging (0.5  
583 mg/ml).

584

### 585 **Transformation assay**

586 Each culture was grown under conditions described above and 30 ml were used to create  
587 competent cells. Cells were washed 3 times in ice-cold 10% glycerol solution and the final  
588 culture was reduced to 250 µl. The cells were aliquoted and stored at -80 °C. A mixture of  
589 pTarget (10 pg/µl) and pGFPuv (10pg/µl) was transformed into 40 µl of culture. In case of  
590 strong interference levels, the ratio was adjusted to a 100:1 (pTarget (100 pg/µl):pGFPuv (1  
591 pg/µl)). The transformability of strains was linear in these concentration regimes, allowing  
592 these different relative concentrations to be used.

593 Electroporated cells were immediately plated in two dilutions on plates containing ampicillin  
594 (100 µg/ml) and glucose (0.4%). Glucose was added to prevent premature expression of  
595 GFPuv which would cause a decrease in fitness of cells containing this plasmid. The next day,



596 96 colonies from each replicate were reinoculated in 96-wells plate with LB containing  
597 ampicillin (100 µg/ml) and IPTG (1 mM). After overnight incubation, the 96 well colonies  
598 were analysed in a plate-reader (Synergy H1, Biotek). pTarget establishment was defined as

$$p_{\text{establishment}} = \frac{\# \text{ pTarget colonies [pGFPuv Transformed]}}{\# \text{ GFPuv colonies [pTarget Transformed]}} \quad (1)$$

599 pTarget establishment was further normalized to the interference level of a  $\Delta cas3$  strain.

600

### 601 **qPCR**

602 Each culture grew under conditions described above and 2 ml were used to extract the DNA.

603 DNA was isolated with the Genejet Genomic DNA kit (Thermo Scientific) and concentrations

604 were measured with the Qubit dsDNA HS Assay kit (Thermo Scientific). qPCR was

605 performed with primers that have been used before in plasmid copy determination (BG8677-

606 BG8680) (Reyes-Lamothe et al., 2014). The Ct value of the PCR amplifying the *dxs* gene and

607 the *bla* gene was a measure for the ratio between chromosomal and plasmid DNA. 1 ng of

608 genomic DNA and 0.5 µM of each primer was added to the iTaq<sup>TM</sup> SYBR Green SYBR

609 Green PCR reaction mixture. A standard curve for the amplification efficiency was made by a

610 dilution series of pMS011, a plasmid containing one copy of the *dxs* and the *bla* gene.

611

### 612 **Slide preparation**

613 In order to work with very clean slides, an extensive cleaning procedure was used (modified

614 from (Chandradoss et al., 2014)). Slides were burned in the oven at 500 °C for two hours, and

615 stored in aluminum foil until the day of usage. Slides were subsequently sonicated in MilliQ,

616 Acetone and KOH, incubated in Piranha Solution (75% H<sub>2</sub>SO<sub>4</sub>, 7.5% H<sub>2</sub>O<sub>2</sub>) and afterwards

617 rinsed with MilliQ. 1% Agarose slabs containing the growth medium were hardened between

618 two cleaned glass slides, spaced slightly apart using parafilm. After hardening, a concentrated

619 culture of cells was added in between the slab and one of the slides. The agarose slab was  
620 always prepared within 20 minutes of the measurement to prevent desiccation.

621

## 622 **Microscope set-up**

623 For the acquisition of microscopy data, a home-build TIRF microscope was used, which is  
624 described in more detail elsewhere (Martens et al., 2018). Briefly, four lasers with different  
625 wavelengths (405, 473, 561 and 642 nm) are situated in a Lighthub laser box (Omicron,  
626 Germany), and are transformed in a collimated beam via a reflective collimator and an optical  
627 fibre. Stroboscopic illumination was used to allow for 2 ms excitation in the temporal middle  
628 of the captured 10 ms long frame (Farooq and Hohlbein, 2015). The excitation laser is  
629 focused on the backfocal plane of a 100x oil immersion SR/HP objective (NA = 1.49, Nikon,  
630 Japan), and the emission is captured on a Zyla 4.2 plus sCMOS camera (Andor, UK). 2x2  
631 pixel binning was used, resulting in 128x128 nm pixels. Data acquisition was performed using  
632 MicroManager (Edelstein et al., 2010). Measurements were performed at room temperature  
633 (21 °C)

634

## 635 **Single-molecule Measurements**

636 The cells were imaged with a brightfield light and 405 and 561 nm lasers. First brightfield  
637 images were taken to find contours of the cells. The 405 nm laser was used to stochastically  
638 activate PAmCherry and the laser intensity was slowly increased during the measurement up  
639 to 10  $\mu$ W. The laser intensities were measured directly after the reflective collimator. With  
640 increasing the laser intensity of the 405 nm laser during the measurements, we aimed at  
641 keeping the number of activated molecules relatively constant (~1-10 per FOV). The 561 nm  
642 laser was used to excite the fluorescent protein tags (40 mW pulses with 2ms pulse width,  
643 leading to average exposure intensity of 8 mW).

644 To measure Cascade localization in cephalixin-treated cells that were stained with DAPI, we  
645 took an alternative approach. To prevent DAPI fluorescence from influencing the  
646 fluorescence measurements of the single molecules, we briefly activated a subset of particles  
647 with the 405 nm laser and subsequently tracked Cascade for a couple of frames with 561 nm  
648 excitation, repeatedly doing this, until most fluorescent proteins were photobleached.  
649

650 **Analysis**

651 **Detection, localization and tracking**

652 Analysis was done with home-built software, adapted from (Holden et al., 2010; Uphoff et al.,  
653 2013). The sCMOS camera we used has pixel dependent offset, gain and variance, which we  
654 took into account to minimize the detection of false positive localisations. We estimated these  
655 parameters by measuring 60.000 dark frames and 20.000 homogeneously illuminated frames  
656 with increasing levels of intensity (Vliet et al., 1998). To further optimize our detection, we  
657 implemented a temporal median filter (time window 400 frames) for background estimation  
658 (Hoogendoorn et al., 2015). The background estimate was not directly subtracted from the  
659 image, but photon statistics were incorporated in a likelihood -ratio test that calculated the  
660 probability of a scenario with and without an emitter for each pixel in every frame. Briefly, a  
661 raw image was first converted into photon counts by using the camera offset and gain maps.  
662 Subsequently for every pixel the intensity ( $I_{\text{tot}}$ ) of a potential emitter was estimated by  
663 Gaussian-weighted ( $\sigma = 1$  pixel) summation of a  $7 \times 7$  window to a background subtracted  
664 image. Subsequently, potential emitters of more than 50 photons were preselected and were  
665 further subjected to a ratio test. The ratio test uses the probability defined for pixel  $i$  to have a  
666 transformed value  $v$  in the  $7 \times 7$  region around the preselected pixels as previously described  
667 (Huang et al., 2013):

$$\begin{aligned} p_{\text{sCMOS}}(v = [(d_i - o_i)/g_i + \text{var}_i/g_i^2] | \mu_i, \text{var}_i, g_i, o_i) \\ = \frac{e^{-(\mu_i + \text{var}_i/g_i^2)} (\mu_i + \text{var}_i/g_i^2)^v}{\Gamma(v + 1)} \end{aligned} \quad (2)$$

668 Where  $d_i$  is the raw image value,  $g_i$  is the gain,  $\text{var}_i$  the variance and  $o_i$  the offset for pixel  $i$ .  
669 The ratio test calculates the product of the probability of all pixels in the subregion in case of  
670 an emitter  $\mu_i = b_i + I_i$ , where  $b_i$  is the estimated background and  $I_i$  is the estimated intensity  
671 of the emitter at pixel  $i$  (which was estimated by a Gaussian from the center of the  $7 \times 7$

672 subregion with emitter intensity  $I_{\text{tot}}$ ) divided by the product of the probability of all pixels in  
673 the subregion in case of absence of an emitter  $\mu_i = b_i$ .

674 We set the likelihood to a level that achieved approximately one false positive per frame of  
675  $512 \times 512$  pixels. This method allowed the detection efficiency to be more robust across and  
676 between FOVs and independent of manual thresholding for each measurement. Detected  
677 particles were subsequently localized with MLE-sCMOS software as previously described  
678 (Huang et al., 2013).

679 The localized particles were subsequently linked. Localizations in subsequent frames that  
680 were closer to each other than 6 pixels in length ( $0.78 \mu\text{m}$ ) were assigned as a track. Particles  
681 were allowed to disappear for one frame (due to blinking/moving out of focus), but these  
682 steps were not used in the calculation of the apparent diffusion coefficient,  $D^*$ .

683

#### 684 **Determination of diffusion coefficients**

685 Several methods were employed to extract diffusion states and their abundances from the  
686 analysed tracks. The distribution of the apparent diffusion coefficients can be fitted to an  
687 analytical equation as reported earlier (Stracy et al., 2015; Vrljic et al., 2002). These equations  
688 depend on the number of steps that is used to generate the average diffusion coefficients of  
689 each particle. We used tracks containing a minimum of four steps and only four steps were  
690 used in longer tracks.

691 For a single diffusion coefficient fitting becomes:

$$f_D(x; D, n) = \frac{\left(\frac{n}{D + \sigma^2/\text{dt}}\right)^n x^{n-1} e^{-\frac{nx}{D + \sigma^2/\text{dt}}}}{(n-1)!} \quad (3)$$

692 With multiple states this equation becomes:

$$f_D(x; A_i, D_i, n) = \sum_{i=1}^N A_i \frac{\left(\frac{n}{D_i + \sigma^2/dt}\right)^n x^{n-1} e^{-\frac{nx}{D_i + \sigma^2/dt}}}{(n-1)!} \quad (4)$$

693 Where  $A_i$  are the fractions ( $\sum A_i = 1$ ),  $D_i^*$  are the apparent diffusion coefficients of the  
694 different states and  $n$  are the number of steps. The localization error ( $\sigma$ ) was found to be 40  
695 nm, based on the apparent diffusion of the slowest moving fraction in our global data set and  
696 similar to other studies using the same fluorescent protein (Stracy et al., 2015; Uphoff et al.,  
697 2013) or set-up (Martens et al., 2018). This equation was fitted to our track distributions with  
698 a Maximum Likelihood Estimation algorithm. The uncertainty in the fit was estimated with  
699 Bootstrap resampling. The list of  $D^*$  values was resampled 20.000 times with replacement to  
700 the size of the original data set. Each resample was then fitted with the same Maximum  
701 Likelihood Estimation algorithm.

702

### 703 **Analytical Diffusion Distribution Analysis (DDA)**

704  $D^*$  Distributions have been fitted in numerous studies of DNA binding proteins (see above)  
705 (Stracy et al., 2015; Vrljic et al., 2002), making use of distributions developed by Qian *et al.*  
706 (Qian et al., 1991). The goal is to find the distribution of measured  $D^*$  values ( $x$ ), for a certain  
707 number of underlying states that each have a probability  $A_i$  and a diffusion coefficient  $D_i$ . It is  
708 derived from repeated convolution of the exponential distribution of displacement, resulting  
709 in a gamma function for each state. These distributions assume, however, that there is no  
710 transitioning occurring between states.

711

712 In order to incorporate dynamics of state transitions into our fitting, we incorporated statistics  
713 coming from photon distribution analysis (PDA) that is used for single molecule FRET  
714 diffusion coefficient distributions (Antonik et al., 2006; Kalinin et al., 2008; Palo et al., 2006).  
715 This method, that we term Diffusion Distribution Analysis (DDA), describes the distribution

716 of time spent in each state given a certain  $k_{\text{on}}^*$ ,  $k_{\text{off}}$  and the integrated time  $t_{\text{int}}$ . Here we  
 717 discuss the analytical way to find this distribution.

718 Firstly, the probability distribution function for time can be calculated by three equations  
 719 corresponding to 0, an odd and an even number of transitions (Palo et al., 2006):

$$W_{\text{contS1}}(t_{S1} = t_{\text{int}} | k_{\text{off}}, t_{\text{int}}) = e^{-k_{\text{off}}t_{\text{int}}} \quad (5)$$

$$W_{\text{oddS1}}(t_{S1} | k_{\text{off}}, k_{\text{on}}^*, t_{\text{int}}) = k_{\text{off}} e^{-k_{\text{off}}t_{S1} - k_{\text{on}}^*t_{S2}} I_0(2\sqrt{k_{\text{off}}k_{\text{on}}^*t_{S1}t_{S2}}) \quad (6)$$

$$W_{\text{evenS1}}(t_{S1} | k_{\text{off}}, k_{\text{on}}^*, t_{\text{int}}) = \sqrt{k_{\text{off}}k_{\text{on}}^*t_{S1}/t_{S2}} e^{-k_{\text{off}}t_{S1} - k_{\text{on}}^*t_{S2}} I_1(2\sqrt{k_{\text{off}}k_{\text{on}}^*t_{S1}t_{S2}}) \quad (7)$$

720 Where  $t_{S1}$  and  $t_{S2}$  are times spent in state  $S1$  and state  $S2$  and  $I_0$  and  $I_1$  are Bessel functions of  
 721 order zero and one respectively. Note that  $t_{S1} + t_{S2} = t_{\text{int}}$ . Equations for starting in state 2  
 722 ( $W_{\text{contS2}}$ ,  $W_{\text{oddS2}}$  and  $W_{\text{evenS2}}$ ), can be found by exchanging  $k_{\text{off}}$  for  $k_{\text{on}}^*$  and  $t_{S1}$  for  $t_{S2}$  and vice  
 723 versa in equations 5-7.

724 We can convert the time spent in the mobile state ( $t_{S2}$ ) to the diffusion coefficient by the  
 725 following equation:

$$D = \frac{D_{\text{free}}t_{S2}}{t_{\text{int}}} \quad (8)$$

726 It follows that the probability distribution functions can be converted by:

$$W(D) = W\left(t_{S2} = \frac{Dt_{\text{int}}}{D_{\text{free}}}\right) \quad (9)$$

727 Furthermore, the chance that the particle at the start is in state 1 or state 2 is provided by:

$$p_{S1} = \frac{k_{\text{on}}^*}{k_{\text{on}}^* + k_{\text{off}}} \quad (10)$$

$$p_{S2} = \frac{k_{\text{off}}}{k_{\text{on}}^* + k_{\text{off}}} \quad (11)$$

728 To correctly describe the distribution over a certain number of frames, we first calculated the  
 729 distribution over a single time frame  $t_f$ . Within a single frame, a particle started in that state

730 can either end in the same state or in a different state. Therefore, in a two-state system the  
 731 probability function for four scenarios have to be calculated:

$$W(D|k_{\text{off}}, k_{\text{on}}^*, t_f)_{S1 \rightarrow S1} = W_{\text{even}S1}(D) + W_{\text{cont}S1} \quad (12)$$

$$W(D|k_{\text{off}}, k_{\text{on}}^*, t_f)_{S1 \rightarrow S2} = W_{\text{odd}S1}(D) \quad (13)$$

$$W(D|k_{\text{off}}, k_{\text{on}}^*, t_f)_{S2 \rightarrow S1} = W_{\text{odd}S2}(D) \quad (14)$$

$$W(D|k_{\text{off}}, k_{\text{on}}^*, t_f)_{S2 \rightarrow S2} = W_{\text{even}S2}(D) + W_{\text{cont}S2} \quad (15)$$

732 Subsequently the probability to find a certain diffusion coefficient ( $x$ ) for a single time step  
 733 given the underlying average diffusion coefficient ( $D$ ) is given by  $f_D(x|D, 1)$  (Eq. 3). Then  
 734 we find the distribution of measured diffusion coefficients for a single frame by:

$$W(x|k_{\text{off}}, k_{\text{on}}^*, t_f)_{Si \rightarrow Sj} = f_D(x|D, 1) W(D|k_{\text{off}}, k_{\text{on}}^*, t_f)_{Si \rightarrow Sj} \quad (16)$$

$i = j = 1, 2$

735 Now that we have the distribution for a single time step, we need to find the distribution for  
 736 the average of multiple frames. For this we use the same method as Qian *et al.* (Qian et al.,  
 737 1991), namely repeated convolution of the distribution for a single frame, while keeping track  
 738 of the start and end state. The probability distributions are therefore:

$$W(x|2t_f)_{S1 \rightarrow S1} = \sum_{i=1,2} (W(x|t_f)_{S1 \rightarrow Si} * W(x|t_f)_{Si \rightarrow S1}) \quad (17)$$

$$W(x|2t_f)_{S1 \rightarrow S2} = \sum_{i=1,2} (W(x|t_f)_{S1 \rightarrow Si} * W(x|t_f)_{Si \rightarrow S2}) \quad (18)$$

$$W(x|2t_f)_{S2 \rightarrow S1} = \sum_{i=1,2} (W(x|t_f)_{S2 \rightarrow Si} * W(x|t_f)_{Si \rightarrow S1}) \quad (19)$$

$$W(x|2t_f)_{S2 \rightarrow S2} = \sum_{i=1,2} (W(x|t_f)_{S2 \rightarrow Si} * W(x|t_f)_{Si \rightarrow S2}) \quad (20)$$



739 For 4 frames, the distributions found for 2 frames can be convoluted again. The full  
740 distribution is then found by summing up each of the partial distributions multiplied by the  
741 chance they start in  $S1$  or  $S2$ :

$$\begin{aligned} W_{\text{tot}} = & p_{S1}(W(x|4t_f)_{S1 \rightarrow S2} + W(x|4t_f)_{S1 \rightarrow S1}) \\ & + p_{S2}(W(x|4t_f)_{S2 \rightarrow S1} + W(x|4t_f)_{S2 \rightarrow S2}) \end{aligned} \quad (21)$$

742 We then have to further correct for the broadening of the distribution of immobile particles  
743 where the apparent step size comes from localization error (Figure S3). As localization error,  
744 in contrast to diffusion, is correlated (Michalet, 2010), the distribution is not described by a  
745 gamma distribution, or any other known exact solution. We find very close agreement with  
746 simulations when we subtract the fraction of immobile particles after four time steps  
747 ( $W_{\text{cont}S1}(t_{S1} = 4t_f)$ , Eq.5 ) multiplied with the distribution of expected  $D^*$  for four time  
748 steps  $f_D(x|0,4)$  (Eq. 3) and replace it with the same fraction of immobilized particles  
749 multiplied with the distribution of expected  $D^*$  for 2.9 time steps  $f_D(x|0,2.9)$ . This value  
750 stems from the variance found for correlated MSD values due to localization error (Michalet,  
751 2010).

752

### 753 **Copy number determination**

754 The copy number of the Cascade complex was determined by generating cell outlines from  
755 brightfield images (only well separated cells were chosen). The cell outlines were made with  
756 the Oufi software (Paintdakhi et al., 2016). The total number of tracks that were found in the  
757 outlined cells generated a copy number (Figure 1D). Because single localization events can  
758 partly stem from false positives, the total amount of tracks was estimated based on the  
759 distribution of tracks longer than 1 step and subsequently this distribution was fitted with an  
760 exponential to calculate the amount of particles that only had a single localization before  
761 bleaching. Similarly, as we know the false positive rate was approximately one per frame, we

762 could also subtract the number of frames from the single step tracks and in this way estimate  
763 the total number of tracks. This approach yielded comparable results.

764 The copy number of proteins in cells are hard to quantify (Lee et al., 2012). Currently, protein  
765 copy numbers can be estimated either by western blot or by single-molecule fluorescence  
766 based methods both of which have specific drawbacks. Although single molecule studies are  
767 regarded as the most accurate method, especially at low copy numbers (Huang et al., 2007),  
768 there are a lot of variables that can lead to over- or underestimation. Underestimation can  
769 originate from maturation time of the protein, misfolded/inactivated protein, false negative  
770 detections, overlap of PSFs and linking of two separate molecules in a single track.  
771 Overestimation can come from failed linking of tracks, false positive detections and blinking  
772 fluorescent proteins.

773 As has been done in previous studies, we take the underestimations stemming from  
774 maturation time (23 min for PAmCherry (Subach et al., 2009)), close to growth rate of 31  
775 min) and estimated *in vivo* folding efficiency (50% (Durisic et al., 2014)) into account  
776 (Uphoff et al., 2013). We also consider that an estimated 40% of the particles we observed  
777 come from Cas8e subunits not active complexes. Taken together, the number of particles we  
778 observe are subtracted by the amount of estimated autofluorescent particles and subsequently  
779 multiplied by a compensation factor of two to reach our estimated copy number values.

780 We believe that the assumptions made in this study could maximally lead to over- or  
781 underestimating our estimated copy numbers by two to three-fold. We note that the relative  
782 amounts we observed between the different expression levels will be independent of these  
783 assumptions.

784

785

786

787 **Cascade in DNA-containing/DNA-free regions**

788 To get an independent measure of the total time fraction spent probing DNA, Cascade was  
789 visualized in cells that were elongated by addition of cephalixin. The drug cephalixin  
790 disabled the ability of the cells to divide, creating elongated cells where nucleoids were  
791 separated by DNA-free spaces (Reyes-Lamothe et al., 2014). Subregions of cell outlines were  
792 manually selected and further refined with the Oufi software (Paintdakhi et al., 2016). The  
793 relative amount of localizations of DNA-free and DNA-containing regions was not calculated  
794 for entire cells, as differences in illumination intensity between parts of the FOV could also  
795 change the amount of localizations detected for different parts of the cell. Each subregion  
796 contained one nucleoid free region, flanked by two nucleoid containing regions with a total  
797 length of around 4  $\mu\text{m}$ . Segments of 0.1  $\mu\text{m}$  divided along the long axis of the cell are  
798 separated into nucleoid or DNA-free segments based on the sum of the DAPI fluorescence  
799 within each segment. The average number of localizations of Cascade molecules in nucleoid  
800 segments divided by the average number of localizations Cascade molecules in DNA-free  
801 segments could be used to infer the DNA bound time fraction (see below,  $f_{\text{onDNA}}$  from  
802 nucleoid enrichment).

803

804 **Persistence sustained binding events for different integrated times**

805 To estimate how long binding events last, one could plot the number of particles remaining  
806 within a certain radius from the first frame position for different number of steps. However,  
807 particles can diffuse away when they are released from DNA or be lost due to photobleaching.  
808 To account for bleaching rates, previous studies increased dark time between exposures, while  
809 keeping exposure times the same (Ho et al., 2018; Knight et al., 2015). This approach uses the  
810 data of all time steps, including only single time steps.

811 As we are investigating lifetime of binding events on a subsecond timescale this approach  
812 fails, as single steps of slow-moving particles, which can be clearly separated from bound  
813 particles on larger timescales ( $t_{\text{int}} > 1$  s), will be counted as bound particles leading to  
814 overestimated off-rates. At these timescales, it is more reliable to use tracks of at least 5 steps  
815 to distinguish bound from moving particles. As we are interested in how many of these events  
816 we observe, depending on the framerate, normalization is required.

817 For this we cannot use the sum of all tracks observed at each framerate, as a larger amount of  
818 fast moving molecules diffuse further than the maximum tracking distance of  $0.78 \mu\text{m}$   
819 between two exposures, and are also more affected by confinement with increasing integrated  
820 time. Therefore, the number of moving particles of certain track length is not an accurate  
821 normalization when comparing different frame times. However, as we used similar exposure  
822 for all frame times, the number of detected localizations per protein is unaffected.  
823 Furthermore, bound molecules are not affected by confinement or linking errors with  
824 increasing frame rates.

825

826 The most robust normalization procedure was therefore to normalize the number of  
827 localizations within sustained bound tracks (all localizations within 1 pixel of the mean  
828 location of the track) to the total number of localizations, as those do not depend on the length  
829 of introduced dark time between exposures. A further increase of the dark time was not  
830 possible as on longer time scales the movement of the plasmid ( $D_{\text{free}}^* = 0.06 \mu\text{m}^2/\text{s}$ ) made  
831 plasmid bound particles diffuse further than 1 pixel.

832

### 833 **Confinement and localization error simulation**

834 To verify whether our new transitional  $D^*$  analysis yielded accurate parameter predictions  
835 and investigate the influence of localization error and confinement on the parameters of the

836 fit, we simulated particles moving and transitioning between bound and free moving states  
837 within the dimensions of an *E. coli* cell, adapted from methodology used in (34). At every  
838 time step particles were simulated to be either in a bound state  $S1$  ( $D = 0 \mu\text{m}^2/\text{s}$ ), or a mobile  
839 state  $S2$  ( $D = D_{\text{free}}$ ). At the starting time point, states were assigned to each particle according  
840 to the equilibrium probability  $p_{S1}$  and  $p_{S2}$  (Eq. 10 + 11). Subsequently, at following time  
841 steps of 0.1 ms, particles in state  $S1$  were assigned to  $S2$  with a probability of  $p_{S1 \rightarrow S2} =$   
842  $k_{\text{off}}t_{\text{step}}$  (where  $t_{\text{step}} = 0.0001 \text{ s}$ ) and particles in state  $S2$  were assigned to  $S1$  with a  
843 probability of  $p_{S2 \rightarrow S1} = k_{\text{on}}^*t_{\text{step}}$ . Displacements in three dimensions at each time step were  
844 taken from a standard normal distribution multiplied with  $\sqrt{2Dt_{\text{step}}}$  (where  $D$  is either 0 for  
845 particles in state  $S1$  or  $D_{\text{free}}$  for particles in state  $S2$ ). Steps beyond the boundaries of a cell  
846 were rejected and new displacements were randomly drawn.  
847 The 2D projection of five localizations at 10 ms time intervals for each molecule was  
848 generated as output and was analysed in our tracking software. Localization error was  
849 included in the simulation by addition of a random displacement for each position taken from  
850 a Gaussian distribution ( $\sigma = 40 \text{ nm}$ ). It was found that changes in outcome of the simulation  
851 were not sensitive to cell length in the range of our bacteria (3-6  $\mu\text{m}$ ), decreasing less than 5%  
852 for the smallest size. Most of the confinement effect is caused by the cell width, which was  
853 relatively constant between all the cells measured.

854

### 855 **Cascade nucleoid enrichment simulation**

856 The simulation above was adapted to simulate the movement in DNA-free and DNA-  
857 containing regions. Particles were simulated to move inside of a cell of 10  $\mu\text{m}$  in length and 1  
858  $\mu\text{m}$  in width consisting of 100 segments without endcaps (0.1  $\mu\text{m}$  per segment). Five  
859 segments were modelled as DNA-free segments and the rest of the segments as DNA-  
860 containing segments.

861 Cascade molecules were randomly placed throughout the cell and subsequently were  
862 simulating with similar time steps as described above, except that moving particles were only  
863 allowed to transition to  $S1$  (bound state) inside of the nucleoid containing regions. Before  
864 recording the position of the simulated particles, the simulation ran for 100.000 time steps (10  
865 s) so that equilibrium was reached. Localization error was added in the same way as described  
866 above.

867

### 868 **Expected free diffusion coefficients**

869 The diffusion coefficient of molecules in classic (Newtonian) fluids can generally be  
870 estimated by the Stokes-Einstein equation. A study measuring the diffusion of GFP multimers  
871 inside the *E. coli* cytoplasm has shown good agreement with the predictions of this equation  
872 (Nenninger et al., 2010), whereas a second study found a different relation attributed to the  
873 complex nature of the cytoplasmic fluid (Mika and Poolman, 2011). To compare our findings  
874 of the apparent free diffusion coefficient of Cas8e ( $\sim 3.5 \mu\text{m}^2/\text{s}$ ) and Cascade ( $\sim 1.0 \mu\text{m}^2/\text{s}$ ), we  
875 therefore looked for reported free cytoplasmic diffusion coefficient values of proteins of  
876 similar size inside *E. coli* cells. For Cas8e, two proteins have been studied with a similar size  
877 to PamCherry-Cas8e (82 kDa), namely CFP-CheR-YFP (86 kDa) (Kumar et al., 2010) and  
878 TorA-GFP3 (84 kDa) (Nenninger et al., 2010), which have reported values of  $1.7 \mu\text{m}^2/\text{s}$  and  $6$   
879  $\mu\text{m}^2/\text{s}$ . Our estimate for Cas8e lies within the range of these values. For Cascade (430 kDa),  
880 the closest reported protein in size is RNA polymerase, for which the  $D_{\text{free}}^*$  was found to be  
881  $1.1 \mu\text{m}^2/\text{s}$  (400 kDa core enzyme, 470 kDa holoenzyme) (Stracy et al., 2015). Furthermore  
882 larger proteins such  $\beta$ -Gal-GFP<sub>4</sub> (582 kDa;  $0.6 \mu\text{m}^2/\text{s}$ ) (Mika et al., 2010), and 30S ribosome  
883 subunits (900 kDa  $0.4 \mu\text{m}^2/\text{s}$ ) (Sanamrad et al., 2014) were reported with lower diffusion  
884 coefficients as expected. These findings support the free apparent diffusion value we found  
885 for Cascade ( $\sim 1.0 \mu\text{m}^2/\text{s}$ ).

886

887  **$f_{\text{onDNA}}$  from nucleoid enrichment**

888 The distribution of Cascade in nucleoid-free and nucleoid containing regions depends on the  
889 time Cascade spends on DNA. We divided the cell up along the long axis into segments of  
890 100 nm wide. During the time Cascade is bound to DNA it can only be inside of the nucleoid  
891 regions whereas, when it is not bound to DNA Cascade can be anywhere within the cell.  
892 Therefore, the average number of particles in a DNA-containing segment is given by:

$$\overline{N_{\text{DNA}}} = \left( \frac{f_{\text{onDNA}}}{sm_{\text{DNA}}} + \frac{1 - f_{\text{onDNA}}}{sm_{\text{tot}}} \right) N_{\text{tot}} \quad (22)$$

893 and the average number of particles in a DNA-free segment is given by

$$\overline{N_{\text{DNA-free}}} = \frac{1 - f_{\text{onDNA}}}{sm_{\text{tot}}} N_{\text{tot}} \quad (23)$$

894 Where  $f_{\text{onDNA}}$  is the fraction of time bound to DNA,  $sm_{\text{DNA}}$  and  $sm_{\text{tot}}$  are the number of DNA  
895 segments and the total number of segments respectively and  $N_{\text{tot}}$  is the total number of  
896 particles in a cell. The ratio, which is equal to the enrichment factor  $EF$ , can then be expressed  
897 as:

$$EF = \frac{\overline{N_{\text{DNA}}}}{\overline{N_{\text{DNA-free}}}} = \left( \frac{f_{\text{onDNA}}}{sm_{\text{DNA}}} + \frac{(1-f_{\text{onDNA}})}{sm_{\text{tot}}} \right) / \frac{1-f_{\text{onDNA}}}{sm_{\text{tot}}} \quad (24)$$

898 If the number of DNA-free segments is much less than the number of DNA segments  
899  $sm_{\text{DNA}} \approx sm_{\text{tot}}$  the expression above can be simplified to:

$$EF = \frac{1}{1-f_{\text{onDNA}}} \quad (25)$$

900 This equation allows extraction of  $f_{\text{onDNA}}$  from  $EF$  directly and implies that this value does not  
901 depend on the diffusion coefficients of the mobile population.

902

903 ***In vivo*  $K_D$  values**

904 The  $K_D$  value is a commonly calculated affinity constant used for binding kinetics of proteins  
905 and assembly of multicomponent systems (McGuigan et al., 2006), but the  $K_D$  has also been  
906 used as an estimate for in vivo binding affinity (Zawadzki et al., 2015). In the reaction scheme  
907  $A + B \rightleftharpoons AB$ , the  $K_D$  is calculated as

$$K_D = [A][B]/[AB] \quad (26)$$

908 For Cascade the reaction scheme is as follows: [Cascade (probing)] + [free target sites]  $\rightleftharpoons$   
909 [Cascade (bound)]. The concentration of a single entity inside of a cell of length 4  $\mu\text{m}$  and  
910 width 1  $\mu\text{m}$  with hemispherical endcaps is approximately 0.5 nM. The copy number for  
911 pTarget was estimated by qPCR to be approximately 100 plasmids per chromosome. As the  
912 number of chromosomes in actively dividing cells is generally higher than one, we used  
913 literature values for the number of chromosomes/cell found in (Wallden et al., 2016),  
914 providing 4/cell which also used a glucose and amino acid enriched M9 medium as growth  
915 medium. This brings the copy number of pTarget to 400/cell, which is equal to 200 nM. For a  
916 Cascade complex carrying one of several crRNAs in the cell, the amount of free target sites is  
917 equal to the copy number of the plasmid pTarget minus the amount of already occupied target  
918 sites of that crRNA, but as the copy number of each target (400) is much higher than the  
919 number of Cascade complexes potentially carrying that crRNA (on average  $130/18 \approx 7$ ), [free  
920 targets]  $\approx$  [pTarget]. The  $K_D$  value was then calculated as:

$$\begin{aligned} K_D &= [\text{pTarget}][\text{Cascade}(\text{probing})]/[\text{Cascade}(\text{bound})] \\ &= 200 \text{ nM } [\text{Cascade}(\text{probing})]/[\text{Cascade}(\text{bound})] \end{aligned} \quad (27)$$

921



## 922 **Theoretical model interference level vs copy number**

923 In the case where the interference level is limited by the target search of the proteins, we can  
924 model the relation based on the distribution of search times of single proteins. The search time  
925 for each Cascade protein individually is exponentially distributed:

$$p_1(t_s) = 1/\langle t_s \rangle e^{-t_s/\langle t_s \rangle} \quad (28)$$

926 The chance that one of  $n$  proteins finds the target at search time  $t_s$  while the other proteins  
927 have not yet found the target is:

$$p_n(t_s) = np_1(t_s) \left( \int_{t_s}^{\infty} p_1(t) dt \right)^{n-1} = n/\langle t_s \rangle e^{-nt_s/\langle t_s \rangle} \quad (29)$$

928 The establishment probability of the plasmid is equal to the likelihood for all search times  
929 larger than  $t_{\text{critical}}$  ( $t_c$ ), the time point at which the cell can no longer clear the invader.  
930 Therefore:

$$p_{\text{establishment}}(t_c) = \int_{t_c}^{\infty} p_n(t) dt = e^{-nt_c/\langle t_s \rangle} \quad (30)$$

931 As the chance of targeting after replication is low, we assume in our model that Cascade is  
932 only able to clear the foreign DNA before replication. Therefore  $t_c$  is equal to the replication  
933 time of the plasmid  $t_R$ .

934 As we found that 20 copies of Cascade reduce interference level by half, this leads to

$$\ln(0.5) = -20t_R/\langle t_s \rangle \quad (31)$$

935 or

$$t_R/\langle t_s \rangle = 0.035 \quad (32)$$

936 Right after transformation, the negative regulators of copy numbers are absent, so replication  
937 in that instant is faster than the growth rate of the cell. Replication time of pTarget has not  
938 been measured so far, but by using a temperature-dependent ori, Olsson *et al.* measured a  
939 replication time of 3 min for a slightly larger plasmid in the absence of copy number control

940 (Olsson et al., 2003b). If we assume pTarget replication occurs on a similar time scale, we get  
941 an estimated search time for one Cascade to find a single target of ~90 minutes.  
942

943 **Data availability**

944 The data that support the findings of this study are available within the paper.

945

946 **References**

- 947 Antonik, M., Felekyan, S., Gaiduk, A., and Seidel, C.A.M. (2006). Separating  
948 structural heterogeneities from stochastic variations in fluorescence resonance energy  
949 transfer distributions via photon distribution analysis. *J. Phys. Chem. B* *110*, 6970–  
950 6978.
- 951 Beloglazova, N., Kuznedelov, K., Flick, R., Datsenko, K. a., Brown, G., Popovic, a.,  
952 Lemak, S., Semenova, E., Severinov, K., and Yakunin, a. F. (2015). CRISPR RNA  
953 binding and DNA target recognition by purified Cascade complexes from *Escherichia*  
954 *coli*. *Nucleic Acids Res.* *43*, 530–543.
- 955 Blosser, T.R., Loeff, L., Westra, E.R., Vlot, M., Künne, T., Sobota, M., Dekker, C.,  
956 Brouns, S.J.J., and Joo, C. (2015). Two distinct DNA binding modes guide dual roles  
957 of a CRISPR-Cas protein complex. *Mol. Cell* *58*, 60–70.
- 958 Bondy-Denomy, J., Garcia, B., Strum, S., Du, M., Rollins, M.F., Hidalgo-Reyes, Y.,  
959 Wiedenheft, B., Maxwell, K.L., and Davidson, A.R. (2015). Multiple mechanisms for  
960 CRISPR-Cas inhibition by anti-CRISPR proteins. *Nature* *526*, 136–139.
- 961 Brouns, S.J.J., Jore, M.M., Lundgren, M., Westra, E.R., Slijkhuys, R.J.H., Snijders,  
962 A.P.L., Dickman, M.J., Makarova, K.S., Koonin, E. V, and van der Oost, J. (2008).  
963 Small CRISPR RNAs guide antiviral defense in prokaryotes. *Science* *321*, 960–964.
- 964 Brown, M.W., Dillard, K.E., Xiao, Y., Dolan, A., Hernandez, E., Dahlhauser, S., Kim,  
965 Y., Myler, L.R., Anslyn, E., Ke, A., et al. (2018). Assembly and translocation of a  
966 CRISPR-Cas primed acquisition complex. *Cell* *175*, 1–13.
- 967 Caforio, A., Siliakus, M.F., Exterkate, M., Jain, S., Jumde, V.R., Andringa, R.L.H.,  
968 Kengen, S.W.M., Minnaard, A.J., Driessen, A.J.M., and van der Oost, J. (2018).  
969 Converting *Escherichia coli* into an archaeobacterium with a hybrid heterochiral  
970 membrane. *Proc. Natl. Acad. Sci. U. S. A.* *115*, 3704–3709.
- 971 Chandradoss, S.D., Haagsma, A.C., Lee, Y.K., Hwang, J.-H., Nam, J.-M., and Joo, C.  
972 (2014). Surface Passivation for Single-molecule Protein Studies. *J. Vis. Exp.* *86*, 4–11.
- 973 Chen, Y.J., Wu, D., Gelbart, W., Knobler, C.M., Phillips, R., and Kegel, W.K. (2018).  
974 Two-Stage Dynamics of in Vivo Bacteriophage Genome Ejection. *Phys. Rev. X* *8*.
- 975 Datsenko, K.A., and Wanner, B.L. (2000). One-step inactivation of chromosomal  
976 genes in *Escherichia coli* K-12 using PCR products. *Proc. Natl. Acad. Sci. U. S. A.* *97*,  
977 6640–6645.
- 978 Datsenko, K.A., Pougach, K., Tikhonov, A., Wanner, B.L., Severinov, K., and

- 979 Semenova, E. (2012). Molecular memory of prior infections activates the CRISPR/Cas  
980 adaptive bacterial immunity system. *Nat. Commun.*
- 981 Davison, J. (2015). Pre-early functions of bacteriophage T5 and its relatives.  
982 *Bacteriophage* 5, e1086500.
- 983 Deveau, H., Barrangou, R., Garneau, J.E., Labonte, J., Fremaux, C., Boyaval, P.,  
984 Romero, D.A., Horvath, P., and Moineau, S. (2008). Phage Response to CRISPR-  
985 Encoded Resistance in *Streptococcus thermophilus*. *J. Bacteriol.* 190, 1390–1400.
- 986 Durisic, N., Laparra-Cuervo, L., Sandoval-Álvarez, Á., Borbely, J.S., and  
987 Lakadamyali, M. (2014). Single-molecule evaluation of fluorescent protein  
988 photoactivation efficiency using an in vivo nanotemplate. *Nat. Methods* 11, 156–162.
- 989 Edelstein, A., Amodaj, N., Hoover, K., Vale, R., and Stuurman, N. (2010). Computer  
990 Control of Microscopes Using  $\mu$ Manager. In *Current Protocols in Molecular Biology*,  
991 (Hoboken, NJ, USA: John Wiley & Sons, Inc.), p. Unit14.20.
- 992 English, B.P., Hauryliuk, V., Sanamrad, A., Tankov, S., Dekker, N.H., and Elf, J.  
993 (2011). Single-molecule investigations of the stringent response machinery in living  
994 bacterial cells. *Proc. Natl. Acad. Sci.* 108, 365–373.
- 995 Van Erp, P.B.G., Jackson, R.N., Carter, J., Golden, S.M., Bailey, S., and Wiedenheft,  
996 B. (2015). Mechanism of CRISPR-RNA guided recognition of DNA targets in  
997 *Escherichia coli*. *Nucleic Acids Res.* 43, 8381–8391.
- 998 Farooq, S., and Hohlbein, J. (2015). Camera-based single-molecule FRET detection  
999 with improved time resolution. *Phys. Chem. Chem. Phys.* 17, 27862–27872.
- 1000 Floc'h, K., Lacroix, F., Barbieri, L., Servant, P., Galland, R., Butler, C., Sibarita, J.-B.,  
1001 Bourgeois, D., and Timmins, J. (2018). Bacterial cell wall nanoimaging by  
1002 autoblanking microscopy. *Sci. Rep.* 8, 14038.
- 1003 Gleditsch, D., Pausch, P., Müller-Esparza, H., Özcan, A., Guo, X., Bange, G., and  
1004 Randau, L. (2018). PAM identification by CRISPR-Cas effector complexes:  
1005 diversified mechanisms and structures. *RNA Biol.* 15476286.2018.1504546.
- 1006 Globyte, V., Lee, S.H., Bae, T., Kim, J., and Joo, C. (2018). CRISPR/Cas9 searches  
1007 for a protospacer adjacent motif by lateral diffusion. *EMBO J.* e99466.
- 1008 Hayes, R.P., Xiao, Y., Ding, F., van Erp, P.B.G., Rajashankar, K., Bailey, S.,  
1009 Wiedenheft, B., and Ke, A. (2016). Structural basis for promiscuous PAM recognition  
1010 in type I-E Cascade from *E. coli*. *Nature* 530, 499–503.
- 1011 Ho, H.N., Van Oijen, A.M., and Ghodke, H. (2018). The transcription-repair coupling  
1012 factor Mfd associates with RNA polymerase in the absence of exogenous damage.

1013 Nat. Commun. *9*, 1570.

1014 Hochstrasser, M.L., Taylor, D.W., Bhat, P., Guegler, C.K., Sternberg, S.H., Nogales,  
1015 E., and Doudna, J. a. (2014). CasA mediates Cas3-catalyzed target degradation during  
1016 CRISPR RNA-guided interference. *Proc. Natl. Acad. Sci. III*, 6618–6623.

1017 Holden, S.J., Uphoff, S., Hohlbein, J., Yadin, D., Le Reste, L., Britton, O.J., and  
1018 Kapanidis, A.N. (2010). Defining the Limits of Single-Molecule FRET Resolution in  
1019 TIRF Microscopy. *Biophys. J.* *99*, 3102–3111.

1020 Hoogendoorn, E., Crosby, K.C., Leyton-Puig, D., Breedijk, R.M.P., Jalink, K.,  
1021 Gadella, T.W.J., and Postma, M. (2015). The fidelity of stochastic single-molecule  
1022 super-resolution reconstructions critically depends upon robust background  
1023 estimation. *Sci. Rep.* *4*, 3854.

1024 Høyland-Kroghsbo, N.M., Muñoz, K.A., and Bassler, B.L. (2018). Temperature, by  
1025 Controlling Growth Rate, Regulates CRISPR-Cas Activity in *Pseudomonas*  
1026 *aeruginosa*. *MBio* *9*.

1027 Huang, B., Wu, H.K., Bhaya, D., Grossman, A., Granier, S., Kobilka, B.K., Zare,  
1028 R.N., Huang, B., Wu, H.K., Bhaya, D., et al. (2007). Counting low-copy number  
1029 proteins in a single cell. *Science* *315*, 81–84.

1030 Huang, F., Hartwich, T.M.P., Rivera-Molina, F.E., Lin, Y., Duim, W.C., Long, J.J.,  
1031 Uchil, P.D., Myers, J.R., Baird, M.A., Mothes, W., et al. (2013). Video-rate nanoscopy  
1032 using sCMOS camera-specific single-molecule localization algorithms. *Nat. Methods*  
1033 *10*, 653–658.

1034 Jackson, S.A., McKenzie, R.E., Fagerlund, R.D., Kieper, S.N., Fineran, P.C., and  
1035 Brouns, S.J.J. (2017). CRISPR-Cas: Adapting to change. *Science* (80-. ).

1036 Jones, D.L., Leroy, P., Unoson, C., Fange, D., Čurić, V., Lawson, M.J., and Elf, J.  
1037 (2017). Kinetics of dCas9 target search in *Escherichia coli*. *Science* *357*, 1420–1424.

1038 Jore, M.M., Lundgren, M., van Duijn, E., Bultema, J.B., Westra, E.R., Waghmare,  
1039 S.P., Wiedenheft, B., Pul, Ü., Wurm, R., Wagner, R., et al. (2011). Structural basis for  
1040 CRISPR RNA-guided DNA recognition by Cascade. *Nat. Struct. Mol. Biol.* *18*, 529–  
1041 536.

1042 Jung, C., Hawkins, J.A., Jones, S.K., Xiao, Y., Rybarski, J.R., Dillard, K.E.,  
1043 Hussmann, J., Saifuddin, F.A., Savran, C.A., Ellington, A.D., et al. (2017). Massively  
1044 Parallel Biophysical Analysis of CRISPR-Cas Complexes on Next Generation  
1045 Sequencing Chips. *Cell* *170*, 35–47.e13.

1046 Kalinin, S., Felekyan, S., Valeri, A., and Seidel, C.A.M. (2008). Characterizing

1047 Multiple Molecular States in Single-Molecule Multiparameter Fluorescence Detection  
1048 by Probability Distribution Analysis. *J. Phys. Chem. B* *112*, 8361–8374.  
1049 Knight, S.C., Xie, L., Deng, W., Guglielmi, B., Witkowsky, L.B., Bosanac, L., Zhang,  
1050 E.T., El Beheiry, M., Masson, J.-B.J.-B.J.-B., Dahan, M., et al. (2015). Dynamics of  
1051 CRISPR-Cas9 genome interrogation in living cells. *Science* *350*, 823–826.  
1052 Kumar, M., Mommer, M.S., and Sourjik, V. (2010). Mobility of cytoplasmic,  
1053 membrane, and DNA-binding proteins in *Escherichia coli*. *Biophys. J.* *98*, 552–559.  
1054 Lee, S.-H., Shin, J.Y., Lee, A., and Bustamante, C. (2012). Counting single  
1055 photoactivatable fluorescent molecules by photoactivated localization microscopy  
1056 (PALM). *Proc. Natl. Acad. Sci.* *109*, 17436–17441.  
1057 Leenay, R.T., Maksimchuk, K.R., Slotkowski, R.A., Agrawal, R.N., Gomaa, A.A.,  
1058 Briner, A.E., Barrangou, R., and Beisel, C.L. (2016). Identifying and Visualizing  
1059 Functional PAM Diversity across CRISPR-Cas Systems. *Mol. Cell* *62*, 137–147.  
1060 Ma, J., and Wang, M.D. (2016). DNA supercoiling during transcription. *Biophys.*  
1061 *Rev.* *8*, 75–87.  
1062 Majsec, K., Bolt, E.L., and Ivančić-Baće, I. (2016). Cas3 is a limiting factor for  
1063 CRISPR-Cas immunity in *Escherichia coli* cells lacking H-NS. *BMC Microbiol.* *16*,  
1064 28.  
1065 Manley, S., Gillette, J.M., Patterson, G.H., Shroff, H., Hess, H.F., Betzig, E., and  
1066 Lippincott-Schwartz, J. (2008). High-density mapping of single-molecule trajectories  
1067 with photoactivated localization microscopy. *Nat. Methods* *5*, 155–157.  
1068 Marraffini, L.A. (2015). CRISPR-Cas immunity in prokaryotes. *Nature* *526*, 55–61.  
1069 Martens, K.J.A., Beljouw, S. van, Els, S. van der, Baas, S., Vink, J.N.A., Brouns,  
1070 S.J.J., Baarlen, P. van, Kleerebezem, M., and Hohlbein, J. (2018). An open  
1071 microscopy framework suited for tracking dCas9 in live bacteria. *BioRxiv* 437137.  
1072 Martynov, A., Severinov, K., and Ispolatov, I. (2017). Optimal number of spacers in  
1073 CRISPR arrays. *PLoS Comput. Biol.* *13*.  
1074 McGuigan, J.A.S., Kay, J.W., and Elder, H.Y. (2006). Critical review of the methods  
1075 used to measure the apparent dissociation constant and ligand purity in Ca<sup>2+</sup> and  
1076 Mg<sup>2+</sup> buffer solutions. *Prog. Biophys. Mol. Biol.* *92*, 333–370.  
1077 Michalet, X. (2010). Mean square displacement analysis of single-particle trajectories  
1078 with localization error: Brownian motion in an isotropic medium. *Phys. Rev. E - Stat.*  
1079 *Nonlinear, Soft Matter Phys.* *82*, 041914.  
1080 Mika, J.T., and Poolman, B. (2011). Macromolecule diffusion and confinement in

1081 prokaryotic cells. *Curr. Opin. Biotechnol.* 22, 117–126.

1082 Mika, J.T., Van Den Bogaart, G., Veenhoff, L., Krasnikov, V., and Poolman, B.

1083 (2010). Molecular sieving properties of the cytoplasm of *Escherichia coli* and

1084 consequences of osmotic stress. *Mol. Microbiol.* 77, 200–207.

1085 Modell, J.W., Jiang, W., and Marraffini, L.A. (2017). CRISPR-Cas systems exploit

1086 viral DNA injection to establish and maintain adaptive immunity. *Nature* 544, 101–

1087 104.

1088 Mojica, F.J.M., Díez-Villaseñor, C., García-Martínez, J., and Almendros, C. (2009).

1089 Short motif sequences determine the targets of the prokaryotic CRISPR defence

1090 system. *Microbiology* 155, 733–740.

1091 Mondal, J., Bratton, B.P., Li, Y., Yethiraj, A., and Weisshaar, J.C. (2011). Entropy-

1092 based mechanism of ribosome-nucleoid segregation in *E. coli* Cells. *Biophys. J.* 100,

1093 2605–2613.

1094 Nenninger, A., Mastroianni, G., and Mullineaux, C.W. (2010). Size dependence of

1095 protein diffusion in the cytoplasm of *Escherichia coli*. *J. Bacteriol.* 192, 4535–4540.

1096 Olsson, J.A., Berg, O.G., Dasgupta, S., and Nordström, K. (2003a). Eclipse period

1097 during replication of plasmid R1: contributions from structural events and from the

1098 copy-number control system. *Mol. Microbiol.* 50, 291–301.

1099 Olsson, J.A., Berg, O.G., Dasgupta, S., and Nordström, K. (2003b). Eclipse period

1100 during replication of plasmid R1: contributions from structural events and from the

1101 copy-number control system. *Mol. Microbiol.* 50, 291–301.

1102 Paintdakhi, A., Parry, B., Campos, M., Irnov, I., Elf, J., Surovtsev, I., and Jacobs-

1103 Wagner, C. (2016). Oufiti: An integrated software package for high-accuracy, high-

1104 throughput quantitative microscopy analysis. *Mol. Microbiol.* 99, 767–777.

1105 Palo, K., Mets, Ü., Loorits, V., and Kask, P. (2006). Calculation of photon-count

1106 number distributions via master equations. *Biophys. J.* 90, 2179–2191.

1107 Pawluk, A., Bondy-Denomy, J., Cheung, V.H.W., Maxwell, K.L., and Davidson, A.R.

1108 (2014). A new group of phage anti-CRISPR genes inhibits the type I-E CRISPR-Cas

1109 system of *Pseudomonas aeruginosa*. *MBio* 5.

1110 Peterson, J., and Phillips, G.J. (2008). New pSC101-derivative cloning vectors with

1111 elevated copy numbers. *Plasmid* 59, 193–201.

1112 Qian, H., Sheetz, M.P., and Elson, E.L. (1991). Single particle tracking. Analysis of

1113 diffusion and flow in two-dimensional systems. *Biophys. J.* 60, 910–921.

1114 Redding, S., Sternberg, S.H.H., Marshall, M., Gibb, B., Bhat, P., Guegler, C.K.K.,



- 1115 Wiedenheft, B., Doudna, J.A., and Greene, E.C.C. (2015). Surveillance and  
1116 Processing of Foreign DNA by the Escherichia coli CRISPR-Cas System. *Cell* *163*, 1–  
1117 12.
- 1118 Reyes-Lamothe, R., Tran, T., Meas, D., Lee, L., Li, A.M., Sherratt, D.J., and  
1119 Tolmasky, M.E. (2014). High-copy bacterial plasmids diffuse in the nucleoid-free  
1120 space, replicate stochastically and are randomly partitioned at cell division. *Nucleic*  
1121 *Acids Res.* *42*, 1042–1051.
- 1122 Sanamrad, A., Persson, F., Lundius, E.G., Fange, D., Gynna, A.H., and Elf, J. (2014).  
1123 Single-particle tracking reveals that free ribosomal subunits are not excluded from the  
1124 Escherichia coli nucleoid. *Proc. Natl. Acad. Sci.* *111*, 11413–11418.
- 1125 Sashital, D.G., Wiedenheft, B., and Doudna, J.A. (2012). Mechanism of Foreign DNA  
1126 Selection in a Bacterial Adaptive Immune System. *Mol. Cell* *46*, 606–615.
- 1127 Severinov, K., Ispolatov, I., and Semenova, E. (2016). The Influence of Copy-Number  
1128 of Targeted Extrachromosomal Genetic Elements on the Outcome of CRISPR-Cas  
1129 Defense. *Front. Mol. Biosci.* *3*.
- 1130 Shao, Q., Hawkins, A., and Zeng, L. (2015). Phage DNA Dynamics in Cells with  
1131 Different Fates. *Biophys. J.* *108*, 2048–2060.
- 1132 De Smet, J., Hendrix, H., Blasdel, B.G., Danis-Wlodarczyk, K., and Lavigne, R.  
1133 (2017). Pseudomonas predators: Understanding and exploiting phage-host  
1134 interactions. *Nat. Rev. Microbiol.*
- 1135 Staals, R.H.J., Jackson, S.A., Biswas, A., Brouns, S.J.J., Brown, C.M., and Fineran,  
1136 P.C. (2016). Interference-driven spacer acquisition is dominant over naive and primed  
1137 adaptation in a native CRISPR-Cas system. *Nat. Commun.* *7*.
- 1138 Sternberg, S.H., Redding, S., Jinek, M., Greene, E.C., and Doudna, J.A. (2014). DNA  
1139 interrogation by the CRISPR RNA-guided endonuclease Cas9. *Nature* *507*, 62–67.
- 1140 Stracy, M., Lesterlin, C., Garza de Leon, F., Uphoff, S., Zawadzki, P., and Kapanidis,  
1141 A.N. (2015). Live-cell superresolution microscopy reveals the organization of RNA  
1142 polymerase in the bacterial nucleoid. *Proc. Natl. Acad. Sci.* *112*, E4390–E4399.
- 1143 Subach, F. V., Patterson, G.H., Manley, S., Gillette, J.M., Lippincott-Schwartz, J., and  
1144 Verkhusa, V. V. (2009). Photoactivatable mCherry for high-resolution two-color  
1145 fluorescence microscopy. *Nat. Methods* *6*, 153–159.
- 1146 Szczelkun, M.D., Tikhomirova, M.S., Sinkunas, T., Gasiunas, G., Karvelis, T.,  
1147 Pschera, P., Siksnys, V., and Seidel, R. (2014). Direct observation of R-loop formation  
1148 by single RNA-guided Cas9 and Cascade effector complexes. *Proc. Natl. Acad. Sci.*

- 1149 *111*, 9798–9803.
- 1150 Uphoff, S., Reyes-Lamothe, R., Garza de Leon, F., Sherratt, D.J., and Kapanidis, A.N.  
1151 (2013). Single-molecule DNA repair in live bacteria. *Proc. Natl. Acad. Sci. U. S. A.*  
1152 *110*, 8063–8068.
- 1153 Vigouroux, A., Oldewurtel, E., Cui, L., Bikard, D., and van Teeffelen, S. (2018).  
1154 Tuning dCas9's ability to block transcription enables robust, noiseless knockdown of  
1155 bacterial genes. *Mol. Syst. Biol.* *14*, e7899.
- 1156 Vliet, L. Van, Sudar, D., and Young, I. (1998). Digital fluorescence imaging using  
1157 cooled charge-coupled device array cameras. *Cell Biol.* *III*, 109–120.
- 1158 Vrljic, M., Nishimura, S.Y., Brasselet, S., Moerner, W.E., and McConnell, H.M.  
1159 (2002). Translational diffusion of individual class II MHC membrane proteins in cells.  
1160 *Biophys. J.* *83*, 2681–2692.
- 1161 Wallden, M., Fange, D., Lundius, E.G., Baltekin, Ö., and Elf, J. (2016). The  
1162 Synchronization of Replication and Division Cycles in Individual *E. coli* Cells. *Cell*  
1163 *166*, 729–739.
- 1164 Westra, E.R., Pul, Ü., Heidrich, N., Jore, M.M., Lundgren, M., Stratmann, T., Wurm,  
1165 R., Raine, A., Mescher, M., Van Heereveld, L., et al. (2010). H-NS-mediated  
1166 repression of CRISPR-based immunity in *Escherichia coli* K12 can be relieved by the  
1167 transcription activator LeuO. *Mol. Microbiol.* *77*, 1380–1393.
- 1168 Westra, E.R., van Erp, P.B.G., Künne, T., Wong, S.P., Staals, R.H.J., Seegers, C.L.C.,  
1169 Bollen, S., Jore, M.M., Semenova, E., Severinov, K., et al. (2012). CRISPR Immunity  
1170 Relies on the Consecutive Binding and Degradation of Negatively Supercoiled  
1171 Invader DNA by Cascade and Cas3. *Mol. Cell* *46*, 595–605.
- 1172 Xiao, Y., Luo, M., Hayes, R.P., Kim, J., Ng, S., Ding, F., Liao, M., and Ke, A. (2017).  
1173 Structure Basis for Directional R-loop Formation and Substrate Handover  
1174 Mechanisms in Type I CRISPR-Cas System. *Cell* *170*, 48–60.
- 1175 Xiao, Y., Luo, M., Dolan, A.E., Liao, M., and Ke, A. (2018). Structure basis for RNA-  
1176 guided DNA degradation by Cascade and Cas3. *Science* *361*, eaat0839.
- 1177 Xue, C., Whitis, N.R., and Sashital, D.G. (2016). Conformational Control of Cascade  
1178 Interference and Priming Activities in CRISPR Immunity. *Mol. Cell* *64*, 826–834.
- 1179 Xue, C., Zhu, Y., Zhang, X., Shin, Y.K., and Sashital, D.G. (2017). Real-Time  
1180 Observation of Target Search by the CRISPR Surveillance Complex Cascade. *Cell*  
1181 *Rep.* *21*, 3717–3727.
- 1182 Zawadzki, P., Stracy, M., Ginda, K., Zawadzka, K., Lesterlin, C., Kapanidis, A.N.,

1183 and Sherratt, D.J. (2015). The Localization and Action of Topoisomerase IV in  
1184 Escherichia coli Chromosome Segregation Is Coordinated by the SMC Complex,  
1185 MukBEF. *Cell Rep.* *13*, 2587–2596.

1186

1187 **Supplementary information** is available

1188

1189 **Acknowledgements** The authors thank Dr. A. Košmrlj (Princeton University) for deriving  
1190 equation 29 presented in Methods. We acknowledge S. Creutzberg for supplying plasmid  
1191 pSC020 and M. Siliakus for supplying plasmid pMS011 and all members of the Hohlbein and  
1192 the Brouns groups for input during group discussions. We thank Jaap Keijsers, Fiona Murphy  
1193 and Stan van de Wall for providing preliminary measurements and scripts for data analysis.  
1194 S.B. is supported by the European Research Council (ERC) Stg grant 639707, and by a Vici  
1195 grant of the Netherlands Organisation for Scientific Research (NWO). R.M is supported by  
1196 the Frontiers of Nanoscience (NanoFront) program from NWO/OCW.

1197

1198 **Author contributions**

1199 S.B. and J.H. conceived and supervised the project; J.V., M.V. R.M., C.A., D.B., B.B. did the  
1200 experimental work; J.V. and J.H. derived the theory; J.V. and K.M. wrote analysis scripts;  
1201 J.V., K.M. and J.H. established microscopy workflow, J.V., J.H. and S.B. wrote the  
1202 manuscript with input from all authors.

1203

1204 **Author information**

1205 The authors declare no competing financial interests. Correspondence and requests for  
1206 materials should be addressed to S.B. ([stanbrouns@gmail.com](mailto:stanbrouns@gmail.com)) or J.H.  
1207 ([johannes.hohlbein@wur.nl](mailto:johannes.hohlbein@wur.nl)).

1208

1209 **Supplementary figures**

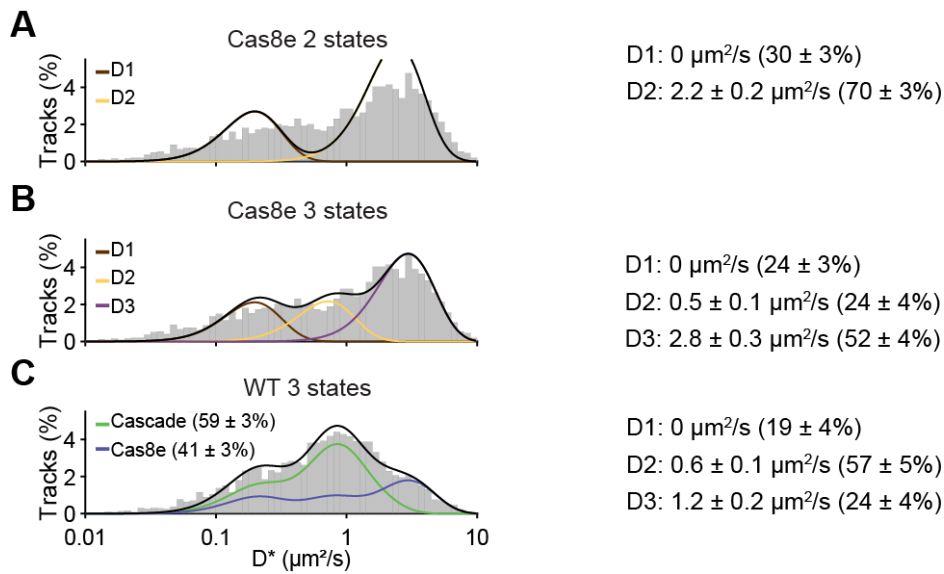

1210

1211 **Figure S1. Static  $D^*$  fitting.** (A)  $D^*$  distribution (left) of the Cas8e strain (Figure 2B) fitted  
1212 with two static states with extracted  $D^*$  value of each fraction on the right (relative  
1213 abundance). The slowest state (D1; brown) was fixed to  $0 \mu\text{m}^2/\text{s}$ . (B) Same as (A) but then for  
1214 three static states. (C)  $D^*$  distribution (left) of the WT strain (Figure 2C). Cas8e distribution  
1215 from Figure S1B was taken and used to fit the distribution with additional three states for  
1216 Cascade diffusion. The relative abundance of Cas8e and Cascade estimated from static  $D^*$   
1217 fitting is similar to that found for dynamic fitting (60 and 40%), even though the distributions  
1218 of Cascade and Cas8e are different. Error estimation in (A-C) is based on bootstrapping ( $\pm$   
1219 standard deviation).

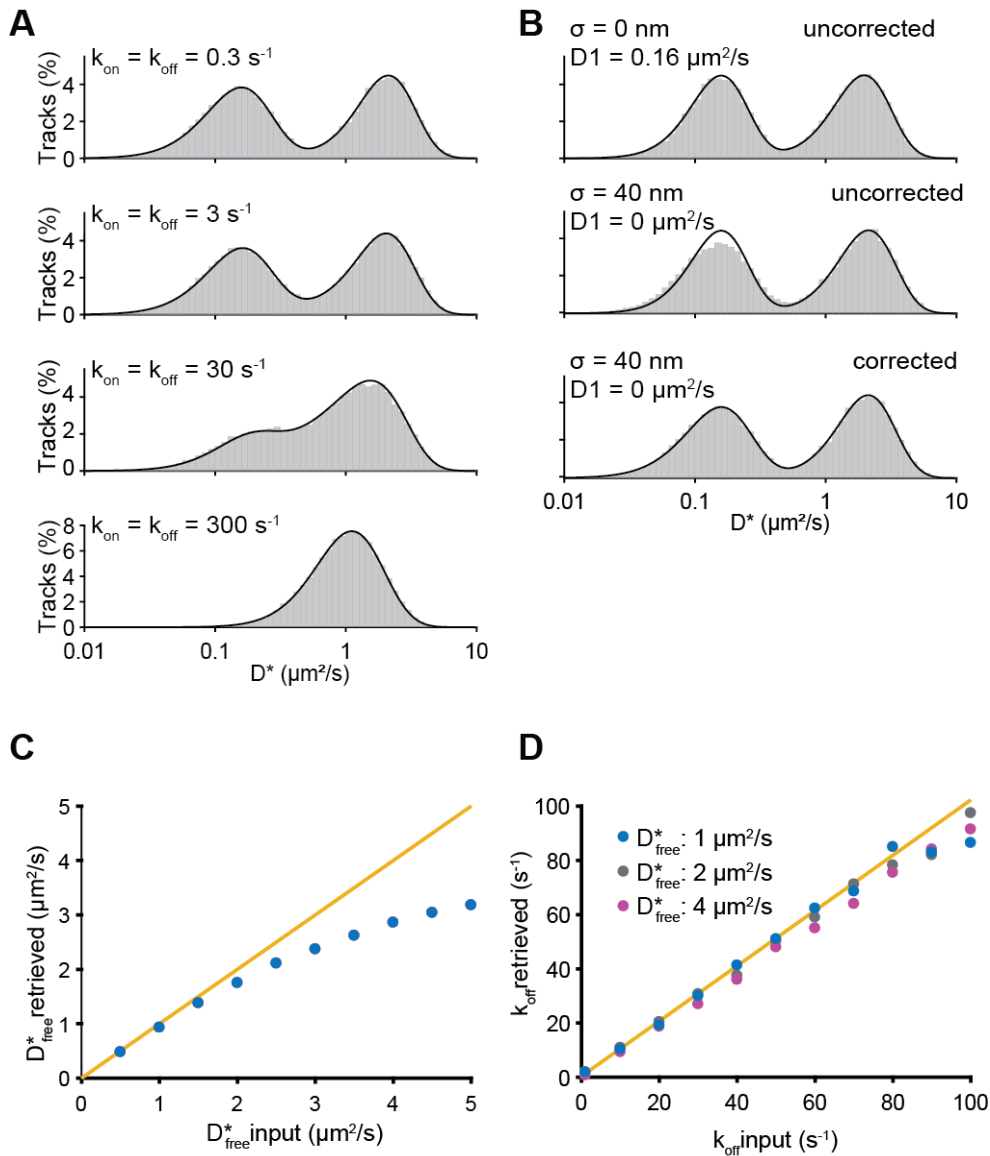

1220

1221 **Figure S2: Performance of analytical DDA.** (A) Comparison of simulation to the theoretical  
 1222 distribution (black line) found with the newly developed analysis method. 50.000 particles  
 1223 were simulated to move without boundaries and position was recorded for 4 consecutive  
 1224 steps. Particles were simulated with  $D^*_{\text{free}} = 2 \mu\text{m}^2/\text{s}$  and increasing on- and off-rates (from 0.3  
 1225 to  $300 \text{ s}^{-1}$ ). The theoretical model (black line) is directly plotted on top of the histogram of  
 1226 simulated  $D^*$  values. A localization error drawn from a Gaussian distribution with  $\sigma = 40 \text{ nm}$   
 1227 was added to both the model and the simulation. (B) Influence of localization error.  
 1228 Distribution of an average of consecutive displacements that are offset by a localization error  
 1229 are correlated, which is why in the absence of localization error in the simulation (top) there is

1230 no requirement for correction. However immobile particles offset by localization error with  
1231 the same mean apparent diffusion coefficient are slightly differently distributed (middle).  
1232 Correction (described in Me) for the immobile particles is sufficient to restore the fit (bottom).  
1233 **(C)** Influence of confinement. Particles were simulated inside of a cell 4  $\mu\text{m}$  long and of 1  $\mu\text{m}$   
1234 diameter. Simulations were run through analysis software to retrieve parameters.  $D_{\text{free}}^*$   
1235 estimates are influenced by confinement where fast moving particles appear to be slower. **(D)**  
1236 The off-rate is not as influenced by effects of confinement and stays the same even for the  
1237 fastest moving particles (purple). Estimates become more unreliable for much faster or slower  
1238 transitions than are measured in the integrated time of typical tracks.

1239

1240

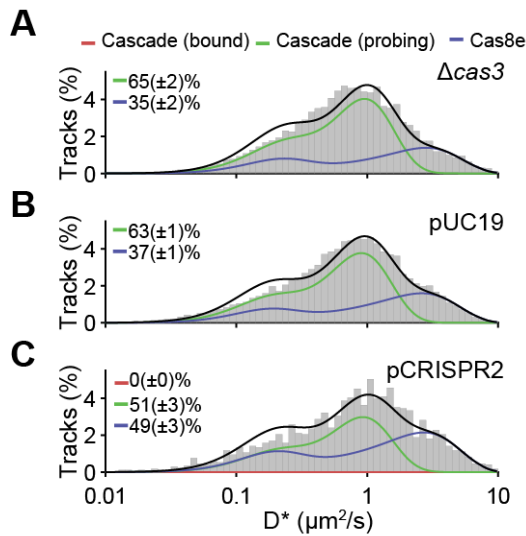

1241

1242 **Figure S3.  $D^*$  Histograms other conditions.**  $D^*$  distributions for (A)  $\Delta cas3$  strain, (B)

1243  $\Delta cas3$  strain + pUC19, the empty variant of pTarget-RNAP and pCRISPR1-RNAP and (C)

1244  $\Delta cas3$  strain + pCRISPR2. The amount of available Cascade complexes in the interference

1245 assay for strain pCRISPR2 targeting (Figure 5H) were extracted from the relative amount of

1246 Cascade complexes in this strain (51%) divided by the number of complexes in the WT strain

1247 (60%).

1248

**A**

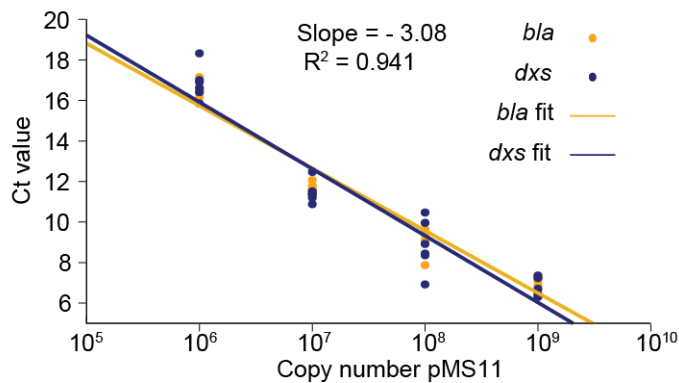

**B**

|                         | Ct (CN) <i>bla</i>                  | Ct (CN) <i>dxs</i>                   | PCN          |
|-------------------------|-------------------------------------|--------------------------------------|--------------|
| $\Delta cas3$ +pTarget  | $8.82 \pm 0.09$<br>( $10^{-5.75}$ ) | $15.15 \pm 0.11$<br>( $10^{-7.76}$ ) | $102 \pm 10$ |
| $\Delta cas3$ +pCRISPR1 | $8.85 \pm 0.07$<br>( $10^{-5.76}$ ) | $15.20 \pm 0.22$<br>( $10^{-7.78}$ ) | $104 \pm 15$ |

1249

1250 **Figure S4. Plasmid copy number determination (A)** Calibration curve of *dxs* and *bla*  
 1251 primer amplification with dilution series of pMS11 (plasmid containing both *dxs* and *bla*  
 1252 gene). The regression of six technical replicates was used to make the calibration curve for  
 1253 both primer sets (regression parameters of *bla* and *dxs* gene in orange and purple  
 1254 respectively). **(B)** The Ct values of *bla* and *dxs* gene amplifications were calculated from  
 1255 biological triplicates. These Ct values were converted to absolute copy numbers (CN) by  
 1256 using the regression values from the calibration curve. The plasmid copy number per  
 1257 chromosome (PCN/chromosome) was calculated by dividing the copy number of the *bla* gene  
 1258 by the copy number of the *dxs* gene. The plasmid copy number per cell was estimated by  
 1259 multiplying PCN/chromosome by the expected number of chromosomes per cell (4) based on  
 1260 a literature value (Wallden et al., 2016).

1261



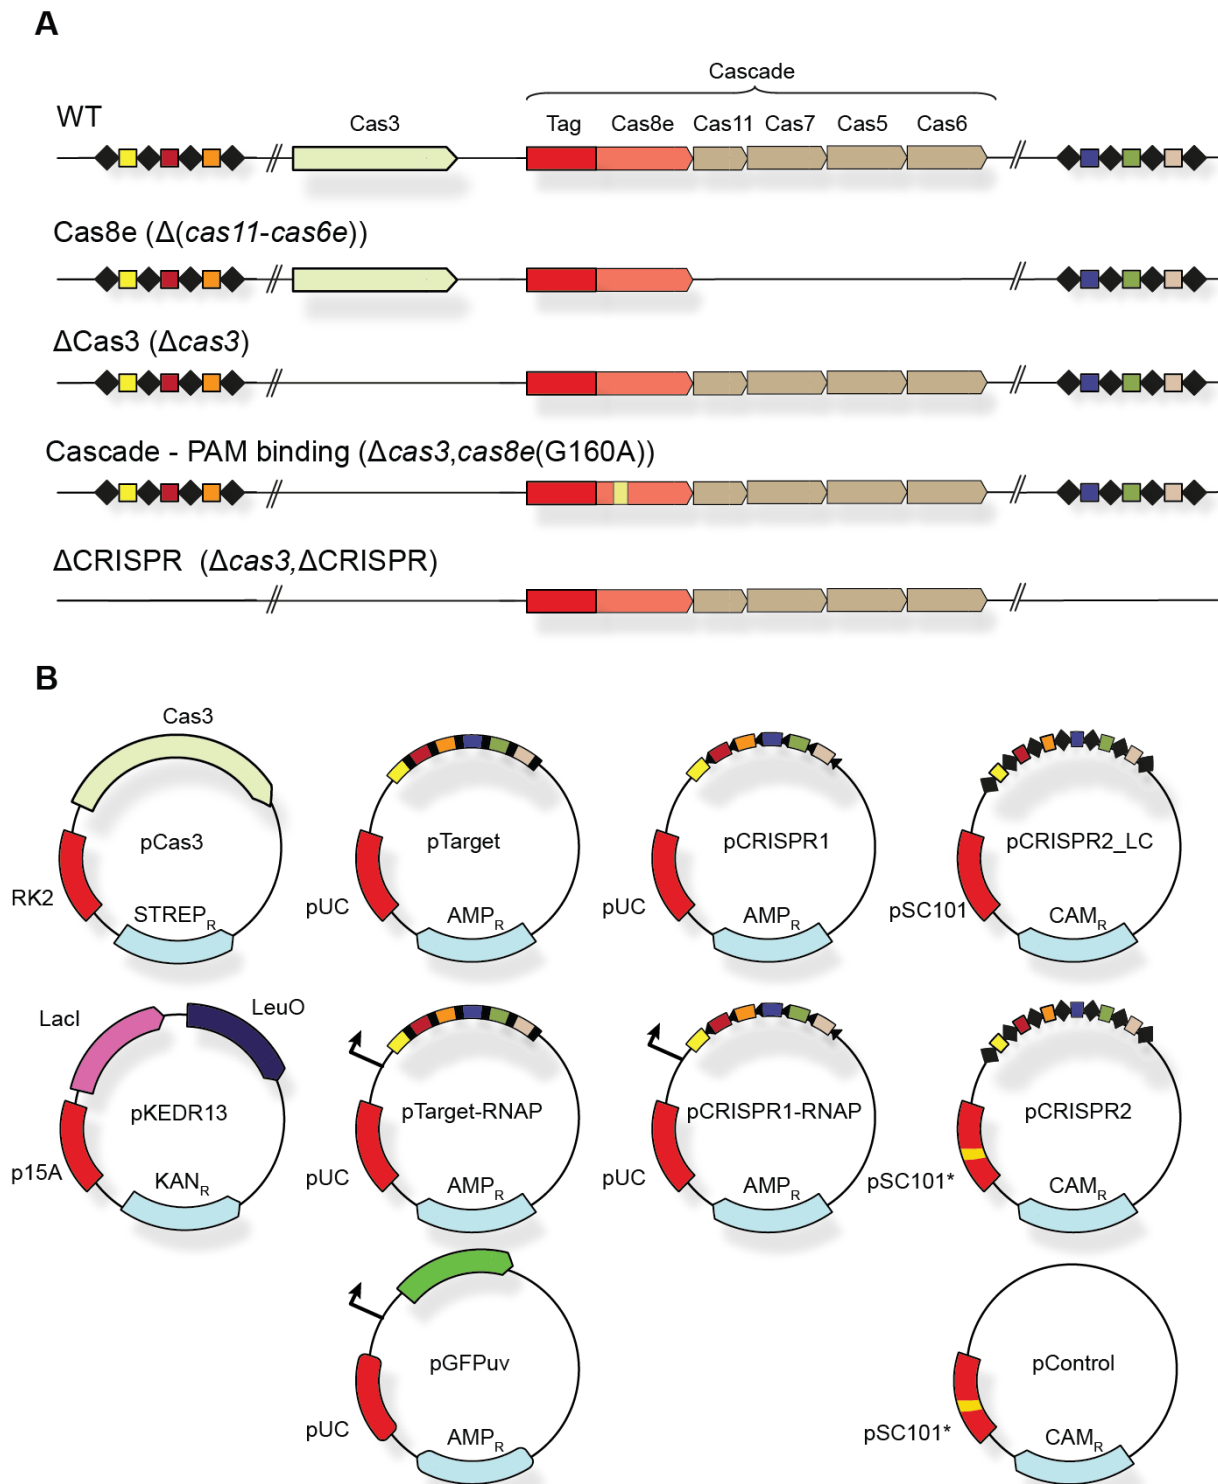

1262

1263 **Figure S5. Strains and plasmids used.** (A) Strains used in this study, strains were  
 1264 constructed with lambda recombination and verified by sequencing. Only part of each  
 1265 CRISPR array indicated (total 18 spacers). (B) Plasmids used in this study. Indicated are the  
 1266 ori (red), antibiotic resistance marker (light blue) and other components on the plasmid. Only

1267 part of the total 18 spacers are indicated for pTarget, pCRISPR1 and pCRISPR2. For  
1268 sequences and descriptions see Table S3 and S4.

1269

1270 **Supplementary tables**

---

|                                  | Doubling time  |
|----------------------------------|----------------|
| K12 BW25113                      | 24.9 ± 0.1 min |
| WT + pKEDR13                     | 24.5 ± 0.4 min |
| WT + pKEDR13 + IPTG              | 31.7 ± 0.6 min |
| WT + pCas3 + pKEDR13 + IPTG      | 33.3 ± 0.2 min |
| ΔCas3 + pKEDR13 + pTarget + IPTG | 31.8 ± 0.4 min |

---

1271

1272 **Table S1: Growth rate of *E. coli* strains used in this study.** Growth rates were determined  
1273 in a plate reader where cells were inoculated in similar conditions as described in Methods.  
1274 The instantaneous growth rate was determined at  $t = 2.5$  hours, which represented the growth  
1275 rate at the time of the microscope studies. Three independent cultures were measured to get  
1276 the mean and standard error values.

1277

| Name   | Description                                                         | Sequence (5'-3')                                                                        |
|--------|---------------------------------------------------------------------|-----------------------------------------------------------------------------------------|
| BG7128 | PAmCherry (lox- <i>cam</i> -lox) insert fw (WT)                     | GGAGGCTATTAAAGGTGCACAAT                                                                 |
| BG7129 | PAmCherry (lox- <i>cam</i> -lox) insert fw ( $\Delta$ <i>cas3</i> ) | GTCTCTTCTTTGCAGGGAGG                                                                    |
| BG7130 | PAmCherry (lox- <i>cam</i> -lox) insert rv (WT)                     | TATCGTCACGGGGCAAAC                                                                      |
| BG7131 | PAmCherry (lox- <i>cam</i> -lox) insert rv (G160A)                  | AGCAGGTATAGACTCATTGGACT                                                                 |
| BG7366 | $\Delta$ CRISPR1 insert (lox- <i>kan</i> -lox) fw                   | GCAGAGGCGGGGGAACCTCCAAGT<br>GATATCCATCATCGCATCCAGTGC<br>GCCGGTGTCTTTTTTACCTGTTTGA<br>CC |
| BG7367 | $\Delta$ CRISPR1 insert (lox- <i>kan</i> -lox) rv                   | GGTTGTTTTTATGGGAAAAAATGC<br>TTAAGAACAAATGTATACTTTTA<br>GATTCCTACCTCTGGTGAAGGAGT<br>TG   |
| BG7368 | $\Delta$ CRISPR2+3 insert (lox- <i>kan</i> -lox) fw                 | TAAGTGAGAAGGCCGGGCGGGAA<br>ACTGCCCGGCCTGAACATACCTGA<br>ATTAGAGTCGGACTTCGCGTTCGC         |
| BG7369 | $\Delta$ CRISPR2+3 insert (lox- <i>cam</i> -lox) rv                 | GATTGTGACTGGCTTAAAAAATCA<br>TTAATTAATAATAGGTTATGTTTA<br>GAGCTAGTTATTGCTCAGCGGTGG        |
| BG8366 | $\Delta$ ( <i>cas11-cas6e</i> ) insert (lox- <i>kan</i> -lox) fw    | TTGAGTGGAATGGGATTAAGGGG<br>AAGCCAGGTCATTTTATTACACCT<br>CAAGGTGTCTTTTTTACCTGTTTGA<br>C   |
| BG8367 | $\Delta$ ( <i>cas11-cas6e</i> ) insert (lox- <i>kan</i> -lox) rv    | ACAAACATTTACGGGAGTTAAAA<br>CCGCAAGGAGGGCCATCAAATGG<br>CTGATTCCTACCTCTGGTGAAGGA<br>GTTG  |
| BG8677 | qPCR <i>bla</i> fw                                                  | CTACGATACGGGAGGGCTTA                                                                    |
| BG8678 | qPCR <i>bla</i> rv                                                  | ATAAATCTGGAGCCGGTGAG                                                                    |
| BG8679 | qPCR <i>dxs</i> fw                                                  | CGAGAAACTGGCGATCCTTA                                                                    |
| BG8680 | qPCR <i>dxs</i> rv                                                  | CTTCATCAAGCGGTTTCACA                                                                    |
| BN370  | pCRISPR2 (array2.3) rv                                              | GTGAGCTGATACCGCTCGCCTGAA<br>CCTCTC TGGCATGGA                                            |
| BN383  | pCRISPR2 (array2.1) fw                                              | TGCTTTAAGAACAAATGTATACTT<br>TTAG                                                        |
| BN384  | pCRISPR2 (array2.1) rv                                              | TCTAAACATAACCTATTATTACCA<br>AGTGATA TCCATCATCGC                                         |
| BN385  | pCRISPR2 (array2.3) fw                                              | GCGATGATGGATATCACTTGGTAA<br>TAATAG GTTATGTTTAGA                                         |

|       |                                            |                                |
|-------|--------------------------------------------|--------------------------------|
| BN373 | Site-directed mutagenesis RepA HC fw       | TGGTTAAAGGCTTTCGGATCTTCC<br>AG |
| BN374 | Site-directed mutagenesis RepA LC fw       | TGGTTAAAGGCTTTGAGATCTTCC<br>AG |
| BN375 | Site-directed mutagenesis RepA HC+LC<br>rv | AAGGATTCCTGATTTCCACAGTTC       |

1278 **Table S2. Primers used in this study**

1279

1280

| Description   | Sequence (5'-3')                                                                                                                                                                                                                                                                                                                                                                                                                                                                                                                                                                                                                                                                                                                                                                                                                                                                                                                                                                                                                                                                                                                                                                                                                                                                                                                                                                                                                                                                                                                                                                                                                                                                                                                                                                                                                                                                                                                                                                                                                                                                                                                                                                                                                                                                                                                                                                                                                                                                                                                                                                                                             |
|---------------|------------------------------------------------------------------------------------------------------------------------------------------------------------------------------------------------------------------------------------------------------------------------------------------------------------------------------------------------------------------------------------------------------------------------------------------------------------------------------------------------------------------------------------------------------------------------------------------------------------------------------------------------------------------------------------------------------------------------------------------------------------------------------------------------------------------------------------------------------------------------------------------------------------------------------------------------------------------------------------------------------------------------------------------------------------------------------------------------------------------------------------------------------------------------------------------------------------------------------------------------------------------------------------------------------------------------------------------------------------------------------------------------------------------------------------------------------------------------------------------------------------------------------------------------------------------------------------------------------------------------------------------------------------------------------------------------------------------------------------------------------------------------------------------------------------------------------------------------------------------------------------------------------------------------------------------------------------------------------------------------------------------------------------------------------------------------------------------------------------------------------------------------------------------------------------------------------------------------------------------------------------------------------------------------------------------------------------------------------------------------------------------------------------------------------------------------------------------------------------------------------------------------------------------------------------------------------------------------------------------------------|
| PAmCherry ins | <p>TGGCGTTAAGCATTTCGCGAGGTTCCAGATGGACAAAAGCCCCAGGC<br/> GATATTTCTATCAACCTGAGGCCAGCGTTTCGAACCCAAACAATTCG<br/> AATGTTAGTCTCTTCTTTGCAGGGAGGCAAGACATGTGTATATCACT<br/> GTAATTCGATATTTATGAGCAGCATCGAAAAATAGCCCGCTGATAT<br/> CATCGATAATACTAAAAAACAGGGAGGCTATTAAAGGTGCACAAT<br/> GTACATCTTCTTTAATTTCCCGGTATGAGATTTTATATTCACAGTAT<br/> GAATATTTTATGTAATAAAATTCATGGTAATTATTATAACTAAAAGT<br/> TTCTTTAATAATAAGGCGCCCTAGGTACCGTTCGTATAATGTATGC<br/> TATACGAAGTTATGAGCTGTTGACAATTAATCATCGGCTCGTATAAT<br/> GTGTGGGCAATGAGCTTGCACCTGCAGAACTTTGATATAACCATGGAG<br/> AAAAAATCACTGGATATAACCACCGTTGATATATCCCAATGGCATC<br/> GTAAGAACAATTTTGAGGCATTTAGTCAGTTGCTCAATGTACCTAT<br/> AACCAGACCGTTCAGCTGGATATTACGGCCTTTTTAAAGACCGTAA<br/> AGAAAAATAAGCACAAGTTTTATCCGGCCTTTATTACATTCTTGCC<br/> CGCCTGATGAATGCTCATCCGGAATCCGTATGGCAATGAAAGACG<br/> GTGAGCTGGTGATATGGGATAGTGTTCACCCTTGTTACACCGTTTTTC<br/> CATGAGCAAACCTGAAACGTTTTTCATCGCTCTGGAGTGAATACCACG<br/> ACGATTTCCGGCAGTTTTCTACACATATATTCGCAAGATGTGGCGTGT<br/> TACGGTGAAAACCTGGCCTATTTCCCTAAAGGGTTTATTGAGAATAT<br/> GTTTTTCGTCTCAGCCAATCCCTGGGTGAGTTTCACCAGTTTTGATTT<br/> AAACGTGGCCAATATGGACAACCTTCTTCGCCCCGTTTTCACTATGG<br/> GCAAATATTATACGCAAGGCGACAAGGTGCTGATGCCGCTGGCGAT<br/> TCAGGTTTCATCATGCCGTTTGTGATGGCTTCCATGTCGGCAGAATGC<br/> TTAATGAATTACAACAGTACTGCGATGAGTGGCAGGGGCGGGGCGTA<br/> AATAACTTCGTATAATGTATGCTATAACGAACGGTATCTAGACTTCGG<br/> GAATGATTGTTATCAATGACGATAATAAGACCAATAACGGTTTTATC<br/> CCTACTTAAGTAGGGAAGGTGCACAATGTACATCTTCTTTTAATTTTC<br/> CCGGTATGAGATTTTATATTCACAGTATGAATATTTTATGTAATAAA<br/> ATTCATGGTAATTATTATAACTAAAAGTTTTCTTTAATAATAAACGA<br/> ATAACTTGCAGATTTGAAATGCATGCATTATTGCTTTAAACAATTC<br/> AACACATCTTAATATATGTATAGGTTAATTGTATTAACCAATGAAT<br/> ATATTTTTGCAGTGAATGTGATTATTGAATTAATTACGCCGATTTTTT<br/> TCTTTGTTTTTACCGATAACGGAAGTGTGCCGACGTATAGAAATGCA<br/> GGAGAAATGTCGGAGCATATGAAGGAGAACAATGGTGAGCAAGG<br/> GCGAGGAGGATAACATGGCCATCATCAAGGAGTTCATGCGCTTCAA<br/> GGTGCACCTGGAGGGGTCCGTGAACGGCCACGAGTTCGAGATCGAG<br/> GGCGAGGGCGAGGGCCGCCCTACGAGGGCACCCAGACCGCCAAG<br/> CTGAAGGTGACCAAGGGTGGCCCCCTTGCCTTCGCCTGGGACATCC<br/> TGTCCCCTCAGTTCATGTACGGCTCCAATGCCTACGTGAAGCACCCC<br/> GCCGACATCCCCGACTACTTTAAGCTGTCTTCCCCGAGGGGCTTCAA<br/> GTGGGAGCGCGTGATGAACTTCGAAGACGGCGGCGTGGTGACCGTG<br/> ACCCAGGACTCCTCCCTGCAGGACGGCGAGTTCATCTACAAGGTGA<br/> AGCTGCGCGGCACCAACTTCCCCTCCGACGGCCCCGTAATGCAGAA<br/> GAAGACCATGGGCTGGGAGACCCCTCTCCGAGCGGATGTACCCCGAG<br/> GACGGCGCCCTGAAGGGAGAGCTCAAGGCGAGGACGAAGCTGAAG<br/> GACGGCGGCCACTATGACACTGAGGTCAAGACCACCTACAAGGCCA<br/> AGAAGCCCGTGCAGTTGCCCGGCGCCTACAACGTCAACCGCAAGTT<br/> GGATATCACCTCCCACAACGAGGACTACACCATCGTGGAACAGTAC</p> |

|                 |                                                                                                                                                                                                                                                                                                                                                                                                                                                                                                                                                                                                                                                                                                                                                                                                                                                                                                                                                                                                    |
|-----------------|----------------------------------------------------------------------------------------------------------------------------------------------------------------------------------------------------------------------------------------------------------------------------------------------------------------------------------------------------------------------------------------------------------------------------------------------------------------------------------------------------------------------------------------------------------------------------------------------------------------------------------------------------------------------------------------------------------------------------------------------------------------------------------------------------------------------------------------------------------------------------------------------------------------------------------------------------------------------------------------------------|
|                 | <p>GAACGTGCCGAGGGCCTCCACTCCACCGGCGGCATGGACGAGCTGT<br/> ACAAGCCCGGGGCGCTCATGGCTAATTTGCTTATTGATAACTGGATC<br/> CCTGTACGCCCGGAAACGGGGGAAAGTCCAAATCATAAATCTGC<br/> AATCGCTATACTGCAGTAGAGATCAGTGGCGATTAAGTTTGCCCCG<br/> TGACGATATGGAAGTGGCCGCTTTAGCACTGCTGGTTTGCATTGGGC<br/> AAATTATCGCCCCGGCAAAGATGACGTTGAATTTGACATCGCAT<br/> AATGAATCCGCTCACTGAAGATGAGTTTCAACAACATCATCGCGCCG<br/> TGGATAGATATGTTCTACCTTAATCACGCAGAACATCCCTTTATGCA<br/> GACCAAAGGTGTCAAAGCAAATGATGTGACTCCAATGGAAAACTG<br/> TTGGCTGGGGTAAGCGGCGGACGAATTGTGCATTTGTCAATCAAC<br/> CGGGGCAGGGTGAAGCATTATGTGGTGGATGCACTGCGATTGCGTT<br/> ATTCAACCAGGCGAATCAGGCACCAGGTTTTTGGTGCCGGTTTTAA<br/> AGCGGTTTACGTGGAGGAACACCTGTAACAACGTTTCGTACGTGGGA<br/> TCGATCTTCGTTCAACGGTGTACTCAATGTCTCACATTACCTCGT<br/> CTTCAAAAACAATTTCTAATGAATCACATACGGAAAACCAACCTA<br/> CCTGGATTAACCTATCAAGTCCAATGAGTCTATACCTGCTTCGTCA<br/> ATTGGGTTTTGTCCGTGGTCTATTCTGGCAACCAGCGCATATTGAATT<br/> ATGCGATCCCATTGGGATTGGTAAATGTTCTTGCTGTGGACAGGAA<br/> AGCAATTTGCGTTATACCGG</p> |
| pTarget insert  | <p>TCTAGAGAATTCGACAGAACGGCCTCAGTAGTCTCGTCAGGCTCCTT<br/> CTGTTTTCGCAAATCTATGGACTATTGCTATTCTTGGGCGCACGGAA<br/> TACAAAGCCGTGTATCTGCTCTTTGGCTCTGCAACAGCAGCACCCAT<br/> GACCACGTCTTAAAATGCTGGTGAGCGTTAATGCCGCAAACACCTT<br/> ATTACGCCTTTTTGCGATTGCCCGGTTTTTGCCCTCCATGGCAGCGTC<br/> AGGCGTGAAATCTCACCGTCGTTGCCTTTTCGGTTCAGGCGTTGCAA<br/> CCTGGCTACCGGGCTTGTAGTCCATCATTCCACCTATGTCTGAACTC<br/> CCTCCGGGGGATAATGTTTACGGTCATGCGCCCCCTTTGGGCGGC<br/> TTGCCTTGCAGCCAGCTCCAGCAGCTTAAGCTGGCTGGCAATCTCTT<br/> TCGGGGTGAGTCCTTTAGTTTCCGTATCTCCGGATTTATAAAGCTGA<br/> CTTGACAGGCGGCGACGCGCAGGGTATGCGCGATTTCGCTTGCAGCCG<br/> CTCAGAAATTCAGACCCGATCCAAACTTTCAACATTATCAATTACA<br/> ACCGACAGGGAGCCCTTAGCGTGTTCCGGCATCACCTTTGGCTTCGGC<br/> TGCTTTGCGTGAGCGTATCGCCGCGCGTCTGCGAAAGCTTGGTACC</p>                                                                                                                                                                                                                              |
| pCRISPR1 insert | <p>TCTAGAGAATTCGACAGAACGGCCTCAGTAGTCTCGTCAGGCTCCG<br/> GCTGTTTTCGCAAATCTATGGACTATTGCTATTCGGGGGCGCACGGA<br/> ATACAAAGCCGTGTATCTGCTCGGTGGCTCTGCAACAGCAGCACCC<br/> ATGACCACGTCGGGAAATGCTGGTGAGCGTTAATGCCGCAAACACC<br/> GGATTACGCCTTTTTGCGATTGCCCGGTTTTTGCCGGCCATGGCAGC<br/> GTCAGGCGTGAAATCTCACCGTCGTTGCCGGTTCAGGCGTTGC<br/> AAACCTGGCTACCGGGCGGGTAGTCCATCATTCCACCTATGTCTGA<br/> ACTCCCGGCCGGGGGATAATGTTTACGGTCATGCGCCCCCGGTGG<br/> GCGGCTTGCCTTGCAGCCAGCTCCAGCAGCGGAAGCTGGCTGGCAA<br/> TCTCTTTCCGGGTGAGTCCGGTAGTTTCCGTATCTCCGGATTTATAA<br/> AGCTGACGGGCAGGCGGCGACGCGCAGGGTATGCGCGATTTCGCGG<br/> GCGACCGCTCAGAAATTCAGACCCGATCCAAACGGTCAACATTAT<br/> CAATTACAACCGACAGGGAGCCCGGAGCGTGTTCCGGCATCACCTTT<br/> GGCTTCGGCTGCGGTGCGTGAGCGTATCGCCGCGCGTCTGCGAAAG<br/> CGGGGTACC</p>                                                                                                                                                                                                                            |

1281 **Table S3. Synthetic DNA inserts used in this study**

1282

1283

| Name in study | Name in storage | Description                                                                                                            | Source                      |
|---------------|-----------------|------------------------------------------------------------------------------------------------------------------------|-----------------------------|
| pKEDR13       | pKEDR13         | Expression plasmid LeuO                                                                                                | (Westra et al., 2010)       |
| pGFPuv        | pGFPuv          | Expression plasmid GFPuv                                                                                               | Clontech                    |
| pMS011        | pMS011          | Plasmid containing <i>bla</i> and <i>dxs</i> gene (qPCR)                                                               | (Caforio et al., 2018)      |
| pSC020        | pSC020          | Plasmid containing Cre and lambda recombinase                                                                          | S. Creutzberg (unpublished) |
| pTarget       | pTU256          | Target plasmid containing all 18 potential protospacers for flanked by 5'-CTT-3'                                       | This study                  |
| pTarget-RNAP  | pTU150          | Target plasmid containing all 18 potential protospacers for flanked by 5'-CTT-3' and <i>plac</i> upstream              | This study                  |
| pCRISPR1      | pTU258          | Target plasmid containing all 18 potential protospacers for flanked by 5'-CGG-3'                                       | This study                  |
| pCRISPR1-RNAP | pTU152          | Target plasmid containing all 18 potential protospacers for flanked by 5'-CGG-3' and <i>plac</i> upstream              | This study                  |
| pCRISPR2_LC   | pTU158          | Plasmid containing all 18 potential protospacers for flanked by repeat sequences; low copy backbone variant of pSC101  | This study                  |
| pCRISPR2      | pTU160          | Plasmid containing all 18 potential protospacers for flanked by repeat sequences; high copy backbone variant of pSC101 | This study                  |
| pControl      | pTU254          | High copy backbone variant of pSC101                                                                                   | This study                  |
| pCas3         | pTU255          | Expression plasmid Cas3                                                                                                | This study                  |

1284 **Table S4. Plasmids used in this study**

1285

1286



1287 **Glossary**

| Full name                      | Symbol              | Description                                                                                                                                                         |
|--------------------------------|---------------------|---------------------------------------------------------------------------------------------------------------------------------------------------------------------|
| Apparent diffusion coefficient | $D^*$               | Apparent due to confinement                                                                                                                                         |
| Bound state                    | $S1$                |                                                                                                                                                                     |
| Dissociation constant          | $K_D$               | Constant which is a measure for the binding affinity of two objects with each other                                                                                 |
| DNA segments                   | $sm_{DNA}$          | Amount of segments defined as containing DNA by DAPI staining                                                                                                       |
| Enrichment Factor              | $EF$                | The number of localizations in DNA-containing segments divided by the number of localizations in DNA-free segments                                                  |
| Fraction DNA bound             | $f_{onDNA}$         | Fraction of the time DNA binding proteins spend on DNA is calculated from the off- and on-rate (Figure 1).                                                          |
| Frametime                      | $t_f$               | Positions of simulated/measured particles are recorded for each frametime                                                                                           |
| Free diffusion coefficient     | $D_{free}^*$        | Diffusion coefficient in the absence of DNA binding. Apparent due to confinement.                                                                                   |
| Integrated time                | $t_{int}$           | Overall timescale: can be one or multiple frametimes                                                                                                                |
| Localization error             | $\sigma$            | Average error in determination of particle position                                                                                                                 |
| Mobile state                   | $S2$                |                                                                                                                                                                     |
| off-rate                       | $k_{off}$           | Rate DNA bound protein is released from DNA. Inverse of residence time                                                                                              |
| pseudo-first order on-rate     | $k_{on}^*$          | Rate mobile protein is binding to DNA. As the amount of potential DNA probing sites is very large, on-rate is independent of DNA concentration (pseudo-first order) |
| pTarget establishment          | $p_{establishment}$ | Measure for interference level calculated from the transformation ratio                                                                                             |

|                          |            |                                                                        |
|--------------------------|------------|------------------------------------------------------------------------|
|                          |            | of pTarget and pGFPuv (Eq. 1)                                          |
| Time step                | $t_{step}$ | Displacements of simulated particles are calculated for each time step |
| Total number of segments | $sm_{tot}$ | Total number of segments in the cell                                   |

1288

1289

1290 **Movie S1 Cascade diffusion through the cell.** Real-time data from WT strain where on left  
1291 cumulative overlay of tracks (each track differently coloured) are plotted on top of a  
1292 brightfield image showing the outline of the cells and on the right the fluorescent signal of the  
1293 single molecules are depicted. Scale bar and time indicated at the bottom (total duration 50 s).  
1294 The movie shows only a small part of a normal FOV.  
1295
